# 1 **Comprehensive analysis of lncRNAs reveals candidate prognostic** 2 **biomarkers in multiple cancer types**

3 Keren Isaev<sup>1,2</sup>, Lingyan Jiang<sup>3</sup>, Christian A. Lee<sup>1,2</sup>, Ricky Tsai<sup>3</sup>, Fiona Coutinho<sup>4</sup>, Peter B.  
4 Dirks<sup>4,5</sup>, Daniel Schramek<sup>3,5</sup>, Jüri Reimand<sup>1,2,\*</sup>

5 1. Ontario Institute for Cancer Research, Toronto, Ontario, Canada

6 2. Department of Medical Biophysics, University of Toronto, Toronto, Ontario, Canada

7 3. Lunenfeld-Tanenbaum Research Institute, Mount Sinai Hospital, Toronto, Ontario, Canada

8 4. SickKids Research Institute, Toronto, Ontario, Canada

9 5. Department of Molecular Genetics, University of Toronto, Toronto, Ontario, Canada

10 \* Correspondence [Juri.Reimand@utoronto.ca](mailto:Juri.Reimand@utoronto.ca)

11

## 12 **ABSTRACT**

13 **Long non-coding RNAs (lncRNAs) are increasingly recognized as functional units in can-**  
14 **cer pathways and powerful molecular biomarkers, however most lncRNAs remain un-**  
15 **characterized. Here we performed a systematic discovery of prognostic lncRNAs in 9,326**  
16 **patient tumors of 29 types using a proportional-hazards elastic net machine-learning**  
17 **framework. lncRNAs showed highly tissue-specific transcript abundance patterns. We**  
18 **identified 179 prognostic lncRNAs whose abundance correlated with patient risk and im-**  
19 **proved the performance of common clinical variables and molecular tumor subtypes.**  
20 **Pathway analysis revealed a large diversity of the high-risk tumors stratified by lncRNAs**  
21 **and suggested their functional associations. In lower-grade gliomas, discrete activation**  
22 **of *HOXA10-AS* indicated poor patient prognosis, neurodevelopmental pathway activation**  
23 **and a transcriptomic similarity to glioblastomas. *HOXA10-AS* knockdown in patient-de-**  
24 **rived glioblastoma cells caused decreased cell proliferation and deregulation of glioma**  
25 **driver genes and proliferation pathways. Our study underlines the pan-cancer potential**  
26 **of the non-coding transcriptome for developing molecular biomarkers and innovative**  
27 **therapeutic strategies.**

28

## 29 INTRODUCTION

30 The human genome encodes numerous long non-coding RNAs (lncRNAs) that lack protein-cod-  
31 ing potential and are sparsely annotated [1, 2]. A recent survey annotated nearly 20,000 high-  
32 confidence human lncRNA genes of at least 200 nucleotides in length, indicating that lncRNAs  
33 are at least as common as protein-coding genes [2]. Globally, lncRNAs are transcribed at lower  
34 levels compared to protein-coding genes and exhibit transcript abundance patterns specific to  
35 tissue types and developmental stages [1, 3]. lncRNAs are involved in the regulation of cellular  
36 processes through multifunctional interactions with the genome, transcriptome and proteome [4,  
37 5]. Individual lncRNAs are increasingly recognized as key players in diverse biological pro-  
38 cesses such as chromatin remodeling in X chromosome inactivation [6], post-transcriptional  
39 gene regulation through alternative splicing [7], and epigenetic silencing through histone modifi-  
40 cation [8]. Computational analysis of lncRNAs enables systematic functional insights and gene  
41 prioritization. For example, k-mer analysis identified non-linear sequence similarities between  
42 lncRNAs that were informative of protein-RNA interactions and sub-cellular localization [9].  
43 However, the vast majority of lncRNAs lack functional annotations and most of our knowledge of  
44 non-coding genes is based on a few well-studied examples.

45 lncRNAs are increasingly implicated in cancer hallmark pathways such as proliferation, angio-  
46 genesis, growth suppression, cell motility and immortality [10]. Specific well-studied lncRNAs  
47 are now recognized as biomarkers for diagnosis, prognosis and therapy of cancer. The first  
48 lncRNA-based biomarker gene *PCA3* is specifically expressed in prostate cancer tissue relative  
49 to normal prostate tissue [11] and is now used in non-invasive tests that complement standard  
50 serum-based tests of prostate-specific antigen [12]. The lncRNA *HOTAIR* is involved in cancer  
51 progression and metastasis through chromatin remodeling and its increased transcript abun-  
52 dance in breast cancer is a robust predictor of tumor metastasis and patient survival [13]. Tran-  
53 scriptional profiling of normal and tumor samples has revealed numerous tissue-specific  
54 lncRNAs [1, 15, 16], indicating further potential for discovery and development of cancer bi-  
55 omarkers based on the noncoding transcriptome. Some lncRNAs are also frequently mutated in  
56 cancer genomes and recent studies have identified candidate driver mutations by surveying  
57 whole-genome sequencing data in multiple cancer types [17, 18]. Projects such as The Cancer  
58 Genome Atlas (TCGA) [19], International Cancer Genome Consortium (ICGC) [20], METABRIC  
59 [21] and others have accumulated multi-omics datasets and patient clinical profiles for thou-  
60 sands of cancer samples. These resources have enabled biomarker studies that associated

61 cancer patient prognosis with transcript abundance of protein-coding genes and their genetic  
62 and epigenetic alterations [22-25]. However, associations of lncRNAs with cancer patient sur-  
63 vival and biological function remain largely unexplored. A recent study characterized recurrent  
64 hypomethylation patterns affecting a thousand lncRNAs in the TCGA PanCanAtlas cohort and  
65 identified the *EPIC1* lncRNA as a marker of poor prognosis in a subset of breast cancers [26].  
66 Another TCGA study associated mutations and transcript abundance profiles of lncRNAs with  
67 regulatory networks and molecular pathways and nominated candidate oncogenic and tumor  
68 suppressive lncRNAs, some of which were functionally validated in cancer cell lines [27]. Analy-  
69 sis of cell-cycle correlated lncRNAs revealed a subset of S-phase enriched lncRNAs whose  
70 transcript abundance profiles correlated with patient survival in multiple TCGA cohorts [28].  
71 However, those studies did not analyze robust prognostic performance of lncRNAs using ma-  
72 chine-learning and cross-validation approaches, indicating further potential to systematically dis-  
73 cover lncRNAs as candidate prognostic biomarkers of multiple cancer types.

74 Here we evaluated the transcript abundance profiles of nearly 6,000 lncRNAs as prognostic bi-  
75 omarkers in human cancers. Using a comprehensive machine-learning analysis, we compiled a  
76 robust catalogue of prognostic lncRNAs across nearly 10,000 tumors of 29 types from the  
77 TCGA PanCanAtlas project [22, 29]. The majority of our candidate lncRNAs showed improved  
78 prognostic potential compared to standard clinical features and molecular tumor subtypes. We  
79 associated prognostic lncRNAs with large-scale deregulation of hallmark cancer pathways, re-  
80 vealing extensive functional diversity of high-risk tumors and potential roles of lncRNAs. Using  
81 functional experiments in patient-derived glioma cell lines, we show that knockdown of the  
82 lncRNA *HOXA10-AS* led to reduced cellular proliferation and transcriptional de-regulation of  
83 hallmark cancer pathways and driver genes. Our study highlights the translational utility of the  
84 human non-coding transcriptome for cancer biomarker discovery and provides a catalogue of  
85 high-confidence lncRNAs for functional experiments and biomarker studies.

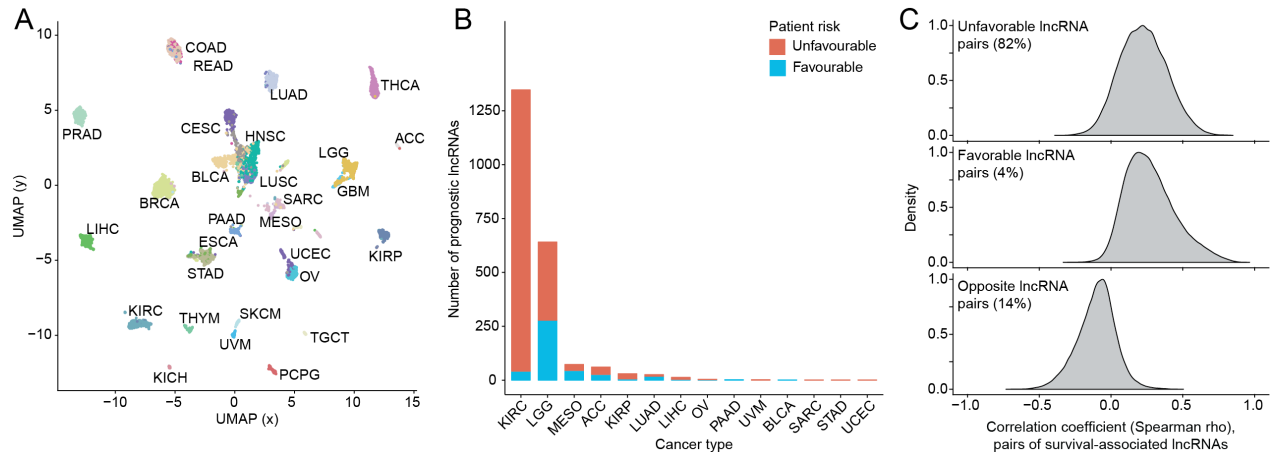

**Figure 1. Tissue specificity and patient survival associations of lncRNAs in multiple cancer types.** **A.** Unsupervised clustering of lncRNA transcript abundance across 29 cancer types in TCGA indicates high tissue-specificity of lncRNA transcription. **B.** Thousands of individual lncRNAs are significantly associated with overall patient survival in multiple cancer types (Cox PH,  $FDR < 0.05$ ). **C.** Survival-associated lncRNAs are characterized by highly redundant transcript abundance profiles. Density plots show correlation coefficients from an exhaustive pair-wise analysis of all survival-associated lncRNAs. lncRNA pairs with matching risk profiles (both unfavourable, top; both favourable, middle) are often positively correlated while lncRNA pairs with opposing risk profiles are often negatively correlated in transcript abundance. Thus the non-coding transcriptome represents a redundant space for prognostic marker discovery that is confounded by gene regulatory and clinical features of tumors.

86

## 87 RESULTS

### 88 Long non-coding RNAs (lncRNAs) show tissue-specific transcript abundance and patient 89 survival associations in multiple cancer types

90 We first characterized the transcript abundance of lncRNAs across 9,326 patients from 29 can-  
91 cer types with matched RNA-sequencing (RNA-seq) data and clinical annotations of the TCGA  
92 PanCanAtlas dataset [22, 29] (**Supplementary Table 1**). We identified 5,785 high-confidence  
93 lncRNAs that were annotated by both the FANTOM CAT project [2] and the Ensembl database  
94 [30] (**Supplementary Table 2**). We first asked whether the lncRNAs showed tissue-specific  
95 transcript abundance patterns in the TCGA pan-cancer dataset. Unsupervised clustering of  
96 lncRNA transcriptomes using the UMAP dimensionality reduction algorithm [31] revealed a ro-  
97 bust grouping of tumor samples by organ systems and histological subtypes (**Figure 1A**), akin  
98 to multi-omics data of protein-coding genes [29]. For example, the clusters indicated lncRNA-  
99 based transcriptional similarity of lower-grade gliomas and glioblastomas of the brain (LGG,  
100 GBM), colon and rectum adenocarcinomas (COAD, READ), and four types of squamous carci-  
101 nomas (BLCA, LUSC, HNSC, CESC). Highly tissue-specific lncRNA abundance patterns sug-  
102 gest that the non-coding transcriptome includes uncharacterized diagnostic and prognostic bi-  
103 omarkers.

104 As a pilot study of lncRNAs as prognostic markers in human cancers, we associated lncRNA  
105 transcript abundance with overall patient survival using Cox proportional-hazards (PH) models.  
106 We used individual lncRNAs as predictors in combination with standard clinical variables such  
107 as patient age, sex, tumor stage and/or grade available in TCGA. Nearly half of lncRNAs were  
108 significantly associated with overall patient survival in at least one cancer type (2,740 of 5,785,  
109 47%, Wald test,  $FDR < 0.05$ ), with the majority of lncRNAs found in kidney renal cell carcinoma  
110 (KIRC) and lower-grade glioma (LGG) (**Figure 1B**). Most of these lncRNAs were associated  
111 with survival in only one cancer type (2,203/2,740 or 80%), confirming tissue-specificity of  
112 lncRNA transcription. The majority of lncRNAs appeared hazardous (81%) as their transcript  
113 abundance was associated with poor prognosis. Interestingly, 18% of lncRNAs were zero-di-  
114 chotomized based on their discrete transcriptional activation patterns, as one group of patients  
115 showed high transcript abundance of a given lncRNA while the other patient group showed  
116 complete lncRNA silencing. These characteristics suggest a high potential for biomarker discov-  
117 ery in non-coding cancer transcriptomes.

118 Having identified thousands of survival-associated lncRNAs in the pilot analysis, we asked  
119 whether these represented robust and independent signals of transcript abundance. We per-  
120 formed an exhaustive co-expression analysis of all 1,116,955 pairs of survival-correlated  
121 lncRNAs in their corresponding cancer types and found that a large fraction (35%) were signifi-  
122 cantly correlated in transcript abundance (Spearman correlation,  $\rho > \pm 0.3$  and  $FDR < 0.05$ ;  
123 **Figure 1C**). As expected, lncRNA pairs with matching prognostic risk were often positively cor-  
124 related while pairs of lncRNAs with opposing risk correlated negatively. Thus, this large pool of  
125 putatively survival-associated lncRNAs represent a considerably narrower space of transcrip-  
126 tional signatures that are confounded by factors such as epigenetic or transcriptional co-regula-  
127 tion, patient clinical characteristics and tumor subtypes. This analysis indicates that many  
128 lncRNAs are expected to be transcriptionally correlated with patient survival in statistical tests  
129 however their confounders and high rate of co-expression limit their use in prognostic models  
130 designed to evaluate previously unseen patients. A systematic computational strategy is needed  
131 to distinguish representative and robust lncRNAs as prognostic biomarkers.

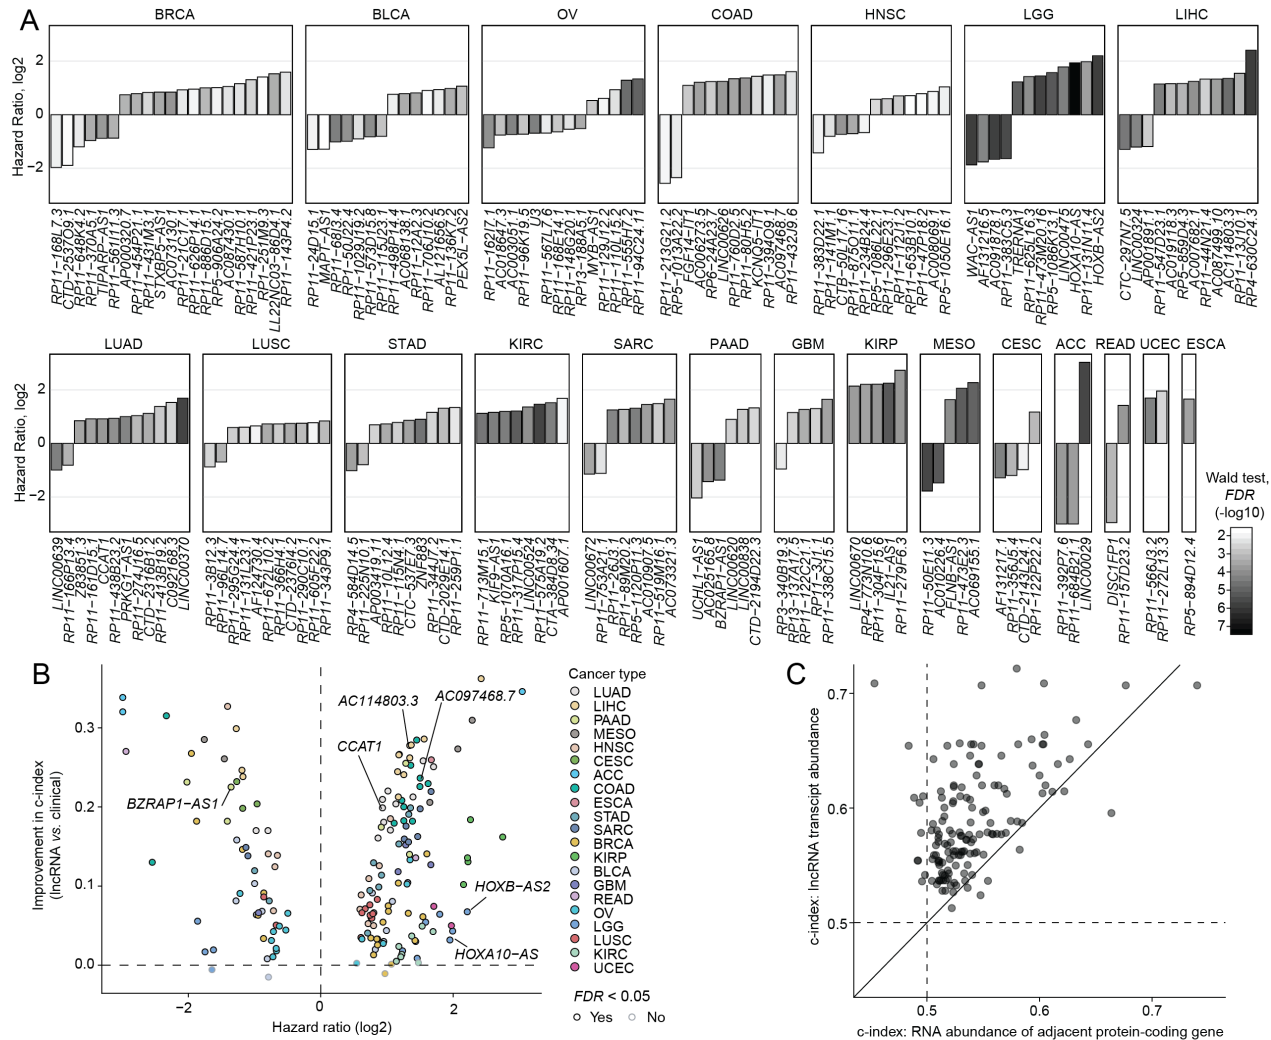

**Figure 2. Elastic net proportional-hazards framework identifies 179 prognostic lncRNAs.** **A.** The catalogue of 179 prognostic lncRNAs detected in 21 cancer types. lncRNAs are ordered by hazard ratios (HR) from the most to the least favourable in each cancer type and colored by statistical significance (Wald test,  $FDR < 0.05$ ). **B.** Univariate prognostic models of 179 lncRNAs outperform baseline models of clinical variables in cross-validation experiments. Prognostic model performance is quantified using the concordance index (c-index). **C.** 179 lncRNAs show superior prognostic performance compared to adjacent protein-coding genes.

132

### 133 Elastic net prognostic IncRNAs framework identifies 179 prognostic lncRNAs

134 To identify robust and non-redundant prognostic lncRNAs, we implemented a machine-learning  
 135 strategy of Cox-PH models with elastic net regularization by adapting earlier studies on the  
 136 prognostic evaluation of omics data [25, 32] (**Supplementary Figure 1**). Briefly, multivariate re-  
 137 gression models with high-confidence lncRNAs as predictors and patient overall survival as re-  
 138 sponse were fitted separately for each cancer type across 1,000 cross-validations with 70/30%



139 data splits for training and testing. Each model initially included a pool of nominally survival-as-  
140 sociated lncRNAs for the given cancer type that were evaluated based on training data (Cox PH  
141  $P < 0.05$ ). The subsequent feature selection step extracted a subset of lncRNAs as high-confi-  
142 dence predictors for that cross-validation iteration. These multivariate models were then evalu-  
143 ated on test data using the concordance index (c-index), an accuracy measure for risk models  
144 with censored survival data [33]. We also fitted baseline models as controls that included only  
145 clinical variables as predictors (e.g., tumor stage, grade, patient age and sex, as available in  
146 TCGA), and additional combined models that included as predictors both the set of clinical vari-  
147 ables and all pre-selected transcript abundance profiles of lncRNAs. We evaluated the entire  
148 series of multivariate lncRNA-based survival models trained through cross-validations.

149 Prognostic models of lncRNA-based predictors showed consistently superior performance in  
150 terms of concordance index values in nine cancer types, compared to baseline models that only  
151 included clinical variables (Wilcoxon rank-sum test,  $FDR < 0.05$ ; **Supplementary Figure 2**).  
152 Combining clinical variables and lncRNA transcript abundance profiles as predictors further im-  
153 proved prognostic performance of our models in 12 of 28 cancer types. To evaluate false-posi-  
154 tive rates of our strategy, we also generated 100 simulated datasets for each cancer type by  
155 randomly reassigning patient survival data within each cohort of a specific cancer type. As ex-  
156 pected, c-indices from the simulated datasets were consistently lower than those obtained from  
157 true data and centered on the performance value of a random predictor ( $c = 0.5$ ), lending confi-  
158 dence to our strategy (**Supplementary Figure 3**). These observations underline the added  
159 value of analyzing lncRNAs as prognostic biomarkers and suggest follow-up validation analyses  
160 in additional patient cohorts.

161 We prioritized 179 high-confidence prognostic lncRNAs in 21 cancer types that were detected  
162 as strong predictors in at least 50% of cross-validated models following the feature selection  
163 step of the elastic net framework (**Figure 2A, Supplementary Table 3**). The majority of  
164 lncRNAs (123/179 or 69%) were detected as unfavorable markers with respect to high transcript  
165 abundance (median HR = 2.3) while 56 lncRNAs were detected as favorable (median HR =  
166 0.48). The largest numbers of prognostic lncRNAs were detected in multiple common cancer  
167 types: breast (21), bladder (14), ovarian (14), colorectal (12) and head and neck cancer (12).  
168 Lower-grade glioma (12) showed the strongest lncRNA candidates in terms of statistical signifi-  
169 cance. To quantify the 179 lncRNAs as prognostic markers individually and in combination with

170 commonly used clinical variables, we separately considered each lncRNA regarding its prog-  
171 nostic model fit and also model performance in cross-validation experiments. The vast majority  
172 of individual lncRNAs (173/179) showed significantly higher prognostic accuracy across 1,000  
173 cross-validations compared to baseline models comprising common clinical variables, with me-  
174 dian increase of 0.11 in concordance index (Wilcoxon rank-sum test,  $FDR < 0.05$ ; **Figure 2B**).  
175 Thus, our catalogue of lncRNAs provides complementary prognostic information to common  
176 clinical variables in a diverse set of human cancers.

177 We verified that our observed prognostic signals were specific to lncRNAs and did not solely re-  
178 flect the prognostic signals of adjacent protein-coding genes. We identified 147 protein-coding  
179 genes located within  $\pm 10$  kbps of 96/179 lncRNAs, including 106 genes that were antisense to  
180 lncRNAs (**Supplementary Table 4**). Prognostic models of lncRNA transcript abundance profiles  
181 exhibited higher concordance measures overall, compared to matching prognostic models of  
182 protein-coding genes (Rank-sum test,  $P = 7.88 \times 10^{-22}$ ; **Figure 2C**). lncRNA-based prognostic  
183 models showed higher concordance index values in 139/147 cases compared to similar models  
184 of adjacent protein-coding genes, with a median improvement of 0.05 in c-index ( $c=0.58$  for  
185 lncRNAs vs  $c=0.53$  for protein-coding genes). Thus, the catalogue of prognostic lncRNAs is not  
186 transcriptionally confounded by adjacent protein-coding genes and represents a distinct non-  
187 coding search space for prognostic biomarker discovery.



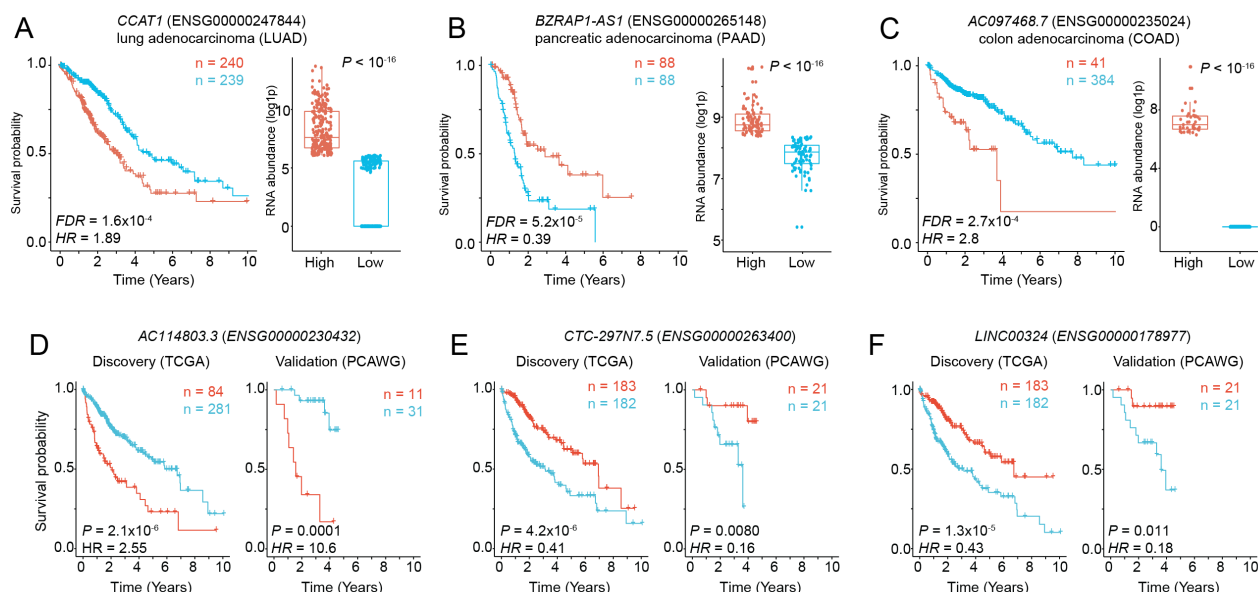

**Figure 3. Examples of prognostic lncRNAs in multiple cancer types.** **A-C.** Prioritized prognostic lncRNAs with Kaplan-Meier survival plots (left) and RNA abundance profiles as boxplots (right). Median-dichotomized transcript abundance profiles (FPKM-UQ) are shown (above median, red; below median, blue). **D-F.** prognostic lncRNAs in liver hepatocellular carcinoma (LIHC) with validation in an external cohort. Kaplan-Meier plots for the discovery cohort (left; TCGA) and the validation cohort (right, PCAWG) are shown. Sizes of patient groups are indicated in color. Hazard ratios (HR) and P-values were computed using Wald tests with no adjustment for covariates.

188

### 189 Top prognostic lncRNAs in cancer types of unmet need

190 We studied the 179 lncRNAs and the adjacent protein-coding genes for known associations with  
 191 cancer. For example, *CCAT1* (ENSG00000247844) located in the chr8p24 super-enhancer lo-  
 192 cus is known to regulate *MYC* transcription through chromatin long-range interactions [34]. We  
 193 found *CCAT1* as a marker of poor prognosis in lung adenocarcinoma (LUAD) ( $HR = 1.9$ , HR  
 194 range = 1.4-2.5, Cox PH  $FDR = 1.6 \times 10^{-4}$ ; **Figure 3A**). Overall, the 149 protein-coding genes lo-  
 195 cated within  $\pm 10$  kbps of the 179 lncRNAs included 10 known cancer genes of the Cancer Gene  
 196 Census database [35] (*BCL10*, *HEY1*, *HOXA11*, *HOXA9*, *IRS4*, *LASP1*, *MYB*, *NCKIPSD*,  
 197 *RNF43*, *SETD2*; Fisher's exact  $P = 0.050$ ), suggesting that a subset of the prognostic lncRNAs  
 198 may be involved in the regulation of cancer driver genes through transcription regulatory and  
 199 chromatin architectural interactions. Improved lncRNA-based survival predictions were found in  
 200 several cancer types with poor outcomes that currently lack reliable prognostic biomarkers, such  
 201 as colon, pancreatic and liver cancer. We reviewed the top candidates in these cancer types.

202 *BZRAP1-AS1* was found as a top significant lncRNA in the pancreatic adenocarcinoma cohort  
 203 (PAAD) (ENSG00000265148; also known as *TSPOAP1-AS1*). Increased RNA abundance of

204 *BZRAP1-AS1* associated with improved patient prognosis (HR = 0.39, HR range = 0.23-0.57,  
205 Cox PH *FDR* =  $5.2 \times 10^{-5}$ ; **Figure 3B**). Interestingly, *BZRAP1-AS1* is partially co-located in the  
206 genome with *RNF43*, a known driver gene with frequent mutations in pancreatic cancer (7%)  
207 and a potential therapeutic target [36, 37]. *RNF43* mRNA abundance alone did not appear prog-  
208 nostic in our dataset, potentially highlighting an independent function of this lncRNA. *BZRAP1-*  
209 *AS1* was recently reported as a survival-associated lncRNA in pancreatic cancer using a com-  
210plementary transcriptomics dataset [38], validating our results obtained from the TCGA dataset.

211 *AC097468.7* was identified as a top significant lncRNA in the colon adenocarcinoma (COAD)  
212 cohort for its unfavorable transcript abundance profile. High abundance of *AC097468.7*  
213 (ENSG00000235024) in a minority of tumors (41/425 or 9.6%; median 1077 FPKM-UQ) was as-  
214 sociated with worse prognosis (HR = 2.8, HR range = 1.7-4.9, Cox PH *FDR* =  $2.7 \times 10^{-4}$ ; **Figure**  
215 **3C**), while the majority of tumors in the COAD cohort showed zero transcript abundance of the  
216 lncRNA and relatively better prognosis. The intergenic lncRNA is located between the genes  
217 *NHEJ1* and *IHH* within 10 kbps of both genes. *NHEJ1* is a core component of the non-homolo-  
218 gous end joining (NHEJ) pathway that conducts DNA double strand break repair and maintains  
219 genome stability [39, 40]. Indian hedgehog (IHH) signaling regulates differentiation of colono-  
220 cytes while epigenetic activation of IHH causes decreased self-renewal of colorectal cancer-initi-  
221 ating cells and increased sensitivity to chemotherapy [41][42]. We speculate that the prognostic  
222 lncRNA *AC097468.7* is involved in the regulation of these pathways through interactions with  
223 adjacent protein-coding genes. In summary, these examples demonstrate the potential of our  
224 catalogue to develop novel biomarkers and find functional lncRNAs for multiple important can-  
225cer types.

### 226 **Computational validation of *AC114803.3*, *CTC-297N7.5* and *LINC00324* as prognostic** 227 **lncRNAs in liver hepatocellular carcinoma**

228 To investigate the 12 prognostic lncRNAs in hepatocellular carcinoma of the liver (LIHC), we  
229 studied an additional cohort of 42 patient tumors. The validation cohort was derived from the  
230 ICGC/TCGA Pan-Cancer Analysis of Whole Genomes (PCAWG) project [20] and was filtered to  
231 exclude tumors from TCGA. We found three lncRNAs with matching prognostic scores and sig-  
232 nificant P-values in both cohorts based on median dichotomization of transcript abundance val-  
233ues (*AC114803.3*, *CTC-297N7.5*, *LINC00324*) (**Figure 3D-F**).

234 *AC114803.3* was identified as a top significant lncRNA in both the discovery and the validation  
235 cohorts of liver cancer. Increased transcript abundance of this lncRNA was associated with  
236 worse prognosis in the TCGA cohort (HR = 2.6, HR range = 1.7-3.7, Cox PH *FDR* =  $1.8 \times 10^{-5}$ )  
237 and confirmed in the PCAWG validation cohort (HR = 10.6, HR range = 3.1-36, *P* = 0.0001)  
238 (**Figure 3D**). In the discovery cohort, *AC114803.3* (*ENSG00000230432*) showed a discrete acti-  
239 vation pattern with high transcript abundance in a minority of patients with poor prognosis  
240 (84/365 or 23% patient tumors with median 4239 FPKM-UQ) whereas a lack of RNA expression  
241 was observed in the other lower-risk group representing the majority of patients (0 FPKM-UQ).  
242 The discrete activation pattern was also observed in the validation cohort (11/42 tumors with  
243 median 0.093 FPKM-UQ, zero otherwise). *AC114803.3* is an antisense lncRNA co-located with  
244 the *PTPRN* gene that encodes a signaling protein and autoantigen in insulin-dependent diabe-  
245 tes [43]. A previous study found that DNA hypermethylation of *PTPRN* was associated with in-  
246 creased progression-free survival in ovarian cancer [44]. DNA hypermethylation is a repressive  
247 epigenetic mark inversely correlated with transcription, thus the study provides complementary  
248 evidence to our observation of high transcript abundance of the antisense lncRNA *AC114803.3*  
249 as a hazardous prognostic marker.

250 Two lncRNAs *CTC-297N7.5* and *LINC00324* were also found as markers of improved prognosis  
251 of LIHC through validation in the external dataset. Increased transcript abundance of *CTC-*  
252 *297N7.5* (*ENSG00000263400*) was associated with improved prognosis in the TCGA cohort  
253 (HR = 0.41, HR range = 0.29-0.61, *FDR* =  $3.2 \times 10^{-5}$ ) and validated in the PCAWG cohort (HR =  
254 0.16, HR range = 0.032-0.76, *P* = 0.0080) (**Figure 3E**). *CTC-297N7.5* (also known as  
255 *TMEM220-AS1*) is an antisense lncRNA co-located with *TMEM220* encoding a poorly charac-  
256 terized transmembrane protein. This lncRNA has been reported recently as a prognostic factor  
257 in hepatocellular carcinoma [45], further validating our analysis. As the third prognostic lncRNA,  
258 increased transcript abundance of *LINC00324* (*ENSG00000178977*) was associated with im-  
259 proved prognosis in the TCGA LIHC cohort (HR = 0.43, HR range = 0.29-0.62, *FDR* =  $6.0 \times 10^{-5}$ )  
260 and validated in the PCAWG cohort (HR = 0.18, HR range = 0.04-0.84, *P* = 0.011) (**Figure 3F**).  
261 This intergenic lncRNA has been functionally associated with the proliferation of gastric cancer  
262 cells [46]. Our computations validation analysis is limited by the available datasets and an over-  
263 all lower detection of lncRNA transcript abundance in the PCAWG dataset. In summary, compu-  
264 tational validation of our candidate lncRNAs in additional transcriptomics datasets and inde-  
265 pendent studies provides further support to these non-coding transcripts as prognostic bi-  
266 omarkers.

267

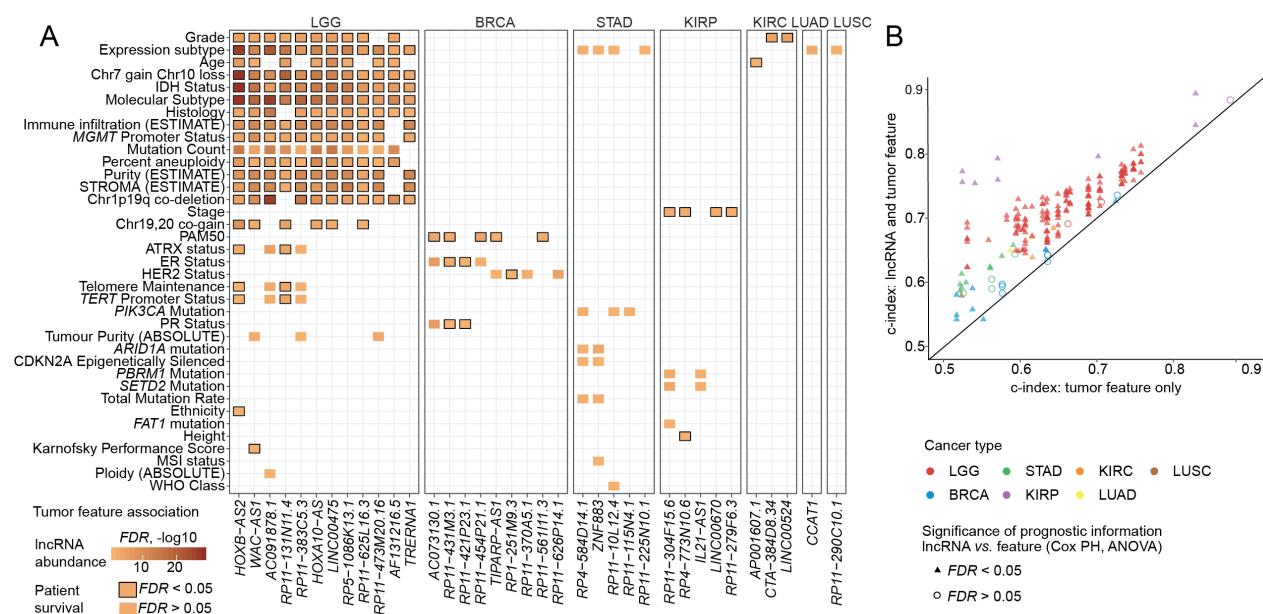

**Figure 4. IncRNA transcript abundance improves prognostic performance of known molecular and clinical tumor features.** **A.** RNA abundance of prognostic lncRNAs is associated with molecular and clinical tumor features and subtypes. Coloured boxes indicate significant associations with lncRNA transcript abundance (Chi-square test,  $FDR < 0.05$ ). A subset of identified tumor features are also independently associated with patient survival (boxes with black frames; Wald test,  $FDR < 0.05$ ). **B.** Combined prognostic models with lncRNA transcript abundance and tumor features (y-axis) show consistently higher concordance values compared to baseline models with only tumor features (x-axis). Combined models with statistically significant contribution from lncRNA transcript abundance are indicated with triangles (Cox PH ANOVA,  $FDR < 0.05$ ). Diagonal shows matching c-index values.

268

## 269 Transcript abundance information of lncRNAs improves prognostic performance of 270 known molecular and clinical tumor features

271 We asked whether the prognostic lncRNAs represented the transcriptomic footprints of well-de-  
272 fined clinical and molecular tumor subtypes. We investigated the statistical interactions of prog-  
273 nostic lncRNAs and of various molecular and clinical tumor annotations defined by TCGA [47].  
274 We limited the analysis to a subset of lncRNAs (113/179) that were detected in 12/21 cancer  
275 types for which annotations of tumor features or subtypes were available in TCGA. We found  
276 224 instances where transcript abundance of lncRNAs (36/113) associated with clinical or mo-  
277 lecular tumor features (Chi-square test or Spearman correlation test,  $FDR < 0.05$ ; **Figure 4A**,  
278 **Supplementary Table 5**). As expected, the majority of these features were also prognostic indi-  
279 vidually in univariate survival analyses (175/224 or 78%, Wald test,  $FDR < 0.05$ ). The prognostic  
280 lncRNAs we identified in lower-grade glioma (LGG) associated with the largest number of mo-  
281 lecular and clinical features, likely owing to well-defined subtypes of this form of brain cancer.

282 For example, transcript abundance profiles of the majority of prognostic lncRNAs in LGG were  
283 significantly associated with documented prognostic features such as *IDH* mutation status and  
284 *MGMT* promoter methylation [48, 49]. These data indicate that transcript abundance profiles of  
285 prognostic lncRNAs capture the transcriptomic signatures of known clinical subtypes and molec-  
286 ular features, further supporting the utility of these lncRNAs as prognostic biomarkers.

287 We asked whether the lncRNA transcript abundance profiles provided complementary infor-  
288 mation to clinical and molecular tumor features. We investigated the 224 cases where the 36  
289 lncRNA transcript abundance profiles significantly associated with various tumor features, by  
290 comparing combined prognostic models (*i.e.*, lncRNAs and tumor features as predictors) with  
291 control prognostic models (*i.e.*, only tumor features as predictors) (**Figure 4B**). The majority of  
292 combined models (209/224 or 93%) showed improved prognostic performance and model fit  
293 (Cox PH ANOVA,  $FDR < 0.05$ ). For example, combining the transcript abundance of lncRNA  
294 *RP11-279F6.3* (ENSG00000259641) with tumor stage resulted in an improved prognostic  
295 model in renal papillary cell carcinoma compared to a baseline model that only incorporated  
296 clinical stage as a predictor (median  $c = 0.93$  vs.  $c = 0.87$ ; Cox PH ANOVA  $FDR = 2.0 \times 10^{-4}$ ).  
297 Similarly, transcript abundance of *RP5-1086K13.1* (ENSG00000224950) combined with co-de-  
298 letion of chr1p and chr19q was a significantly better prognostic model in LGG compared to a  
299 baseline model that only used these chromosomal alterations for prediction (median  $c = 0.71$  vs.  
300  $c = 0.59$ , Cox PH ANOVA;  $FDR = 4.4 \times 10^{-7}$ ). These results are limited by the molecular and clini-  
301 cal tumor features annotated by TCGA, as well as the lower overall transcript abundance and  
302 high tissue specificity of lncRNA transcription. Our analysis shows that integrating transcriptomic  
303 profiles of lncRNAs can improve the prognostic potential of previously established tumor fea-  
304 tures such as molecular subtypes and common genomic mutations.



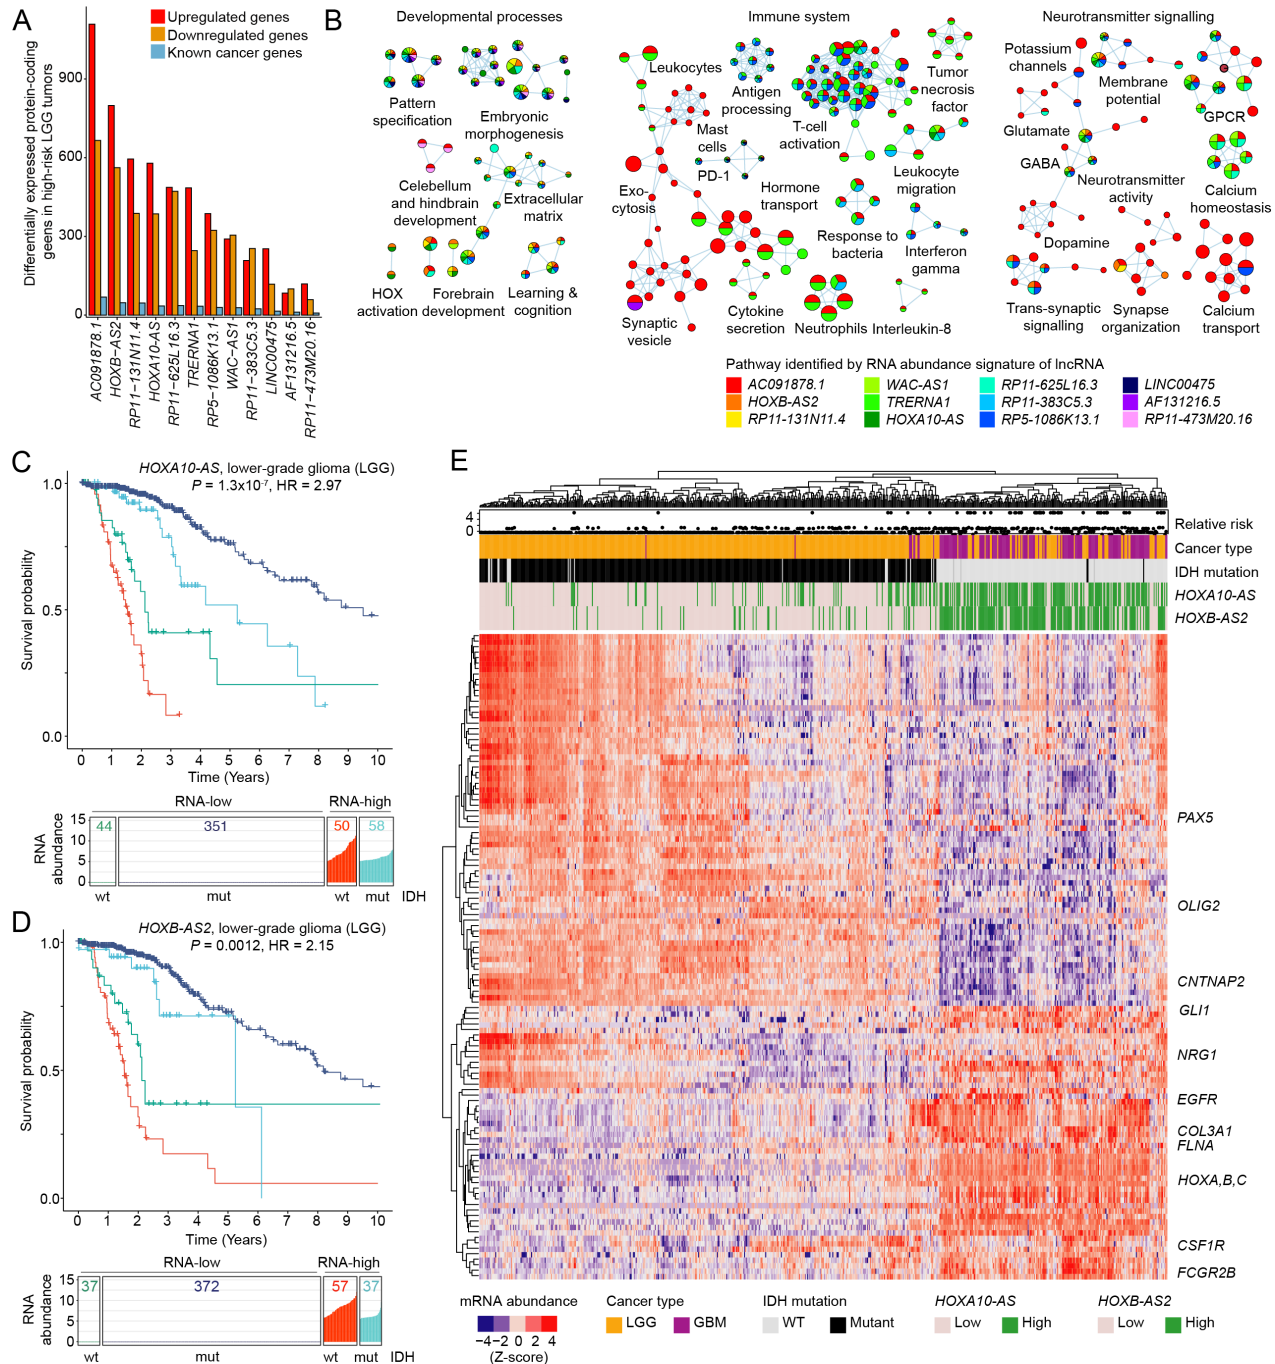

**Figure 5. Prognostic lncRNAs in gliomas associate with deregulated driver genes and neurodevelopmental pathways.** **A.** Prognostic lncRNAs in lower-grade glioma (LGG) associate with differential transcript abundance of protein-coding genes ( $FDR < 0.05$ ), including many known driver genes. *IDH1/2* mutation status was modeled as a covariate in transcript abundance analysis. **B.** Pathway enrichment analysis of lncRNA-associated protein-coding genes in LGG shows de-regulation of neurodevelopmental, immune system and neurotransmitter processes (ActivePathways  $FWER < 0.05$ ). Enrichment map shows nodes as significantly enriched GO biological processes or Reactome pathways, nodes sharing many genes are connected with edges, and nodes are grouped by overall functional themes. Node colors represent the prognostic lncRNAs whose transcriptional signatures associated with the specific pathways. **D-E.** Transcript abundance of *HOXA10-AS* and *HOXB-AS2* combined with *IDH1/2* mutation status improves prognostic models in LGG. Kaplan-Meier plots for *HOXA10-AS* and *HOXB-AS2* (top) and distributions of patients by transcript abundance (high vs. low; log<sub>1p</sub> FPKM-UQ) and *IDH* mutation status (wildtype vs. mutant) (bottom). Numbers indicate patient counts. **E.** *HOXA10-AS* and *HOXB-AS2* transcript abundance profiles define a malignancy gradient across LGG and glioblastoma (GBM). Heatmap shows differentially expressed genes in lncRNA-associated brain development pathways. High-risk LGGs with activated transcription of *HOXA10-AS* and *HOXB-AS2* cluster with GBMs and primarily include *IDH*-wildtype tumors. Known driver genes are shown.



306 **Prognostic lncRNAs in gliomas are associated with developmental, immune response**  
307 **and neurotransmission pathways**

308 To study potential functional associations, we asked whether transcript abundance profiles of  
309 prognostic lncRNAs were associated with transcriptome-wide changes in high-risk tumors. For  
310 each lncRNA, we identified differentially regulated genes and mapped their biological context  
311 using pathway enrichment analysis [50]. The majority of prognostic lncRNAs (121/179 or 68%)  
312 associated with clear transcriptional signatures in lncRNA-stratified high-risk tumors, including at  
313 least 30 protein-coding genes with a two-fold change in transcript abundance ( $FDR < 0.05$ ;  
314 **Supplementary Figure 4, Supplementary Table 6**). These genes were enriched in 3,048 GO  
315 biological processes and Reactome pathways in total ( $FDR < 0.01$  from g:Profiler; **Supplemen-**  
316 **tary Table 7**). The majority of detected pathways (75%) were enriched in the transcriptional sig-  
317 natures of a few lncRNAs (one to five) while a small subset of processes (5%) related to extra-  
318 cellular matrix organization were enriched in the signatures of more than 15 lncRNAs. This pan-  
319 cancer pathway analysis highlights the extent of functional diversity of high-risk tumors stratified  
320 by lncRNA abundance.

321 We studied the 12 prognostic lncRNAs identified in lower-grade glioma and evaluated their tran-  
322 scriptome-wide associations. We used a stringent approach that systematically accounted for  
323 the tumor mutation status of *IDH1/2* genes, a known marker of improved prognosis in glioma  
324 [51]. All groups of lncRNA-stratified high-risk LGG tumors were characterized by transcriptomic  
325 differences that were significant beyond *IDH* mutations (**Figure 5A**). To find pathways and pro-  
326 cesses commonly deregulated in these high-risk tumors, we performed an integrative analysis  
327 of the 12 lncRNA-stratified mRNA abundance signatures. This analysis revealed 325 biological  
328 processes and pathways that mapped to 1,345 protein-coding genes co-expressed with one or  
329 more of the 12 prognostic lncRNAs (ActivePathways [52]  $FWER < 0.05$ ; **Figure 5B**). The path-  
330 way analysis highlighted 70 known cancer genes that were more frequently differentially ex-  
331 pressed than expected from chance alone (Fisher's exact test,  $P = 0.006$ ; including key onco-  
332 genes *EGFR* and *TERT*). The pathway analysis revealed three broad functional themes: devel-  
333 opmental processes (e.g., forebrain development), immune system (e.g., T-cell activation) and  
334 neurotransmitters (e.g., trans-synaptic signaling). The majority of pathways (192/325 or 59%)  
335 were deregulated in the transcriptomic signatures of multiple prognostic lncRNAs, however only  
336 few pathways were apparent in all lncRNA-based transcriptomic signatures. These prognostic

337 lncRNAs of LGG are co-regulated with diverse processes involved in brain development, neuro-  
338 transmitter activity and tumorigenesis, suggesting that a subset of lncRNAs modulate cancer-  
339 related biological processes in brain tumors.

### 340 **Transcript abundance of *HOXA10-AS* and *HOXB-AS2* defines a malignancy gradient** 341 **across low- and high-grade gliomas**

342 To further study the functional roles of prognostic lncRNAs in LGGs, we performed a transcrip-  
343 tome-wide comparison of lower-grade glioma and high-grade glioblastoma (GBM) tumors in  
344 TCGA. We focused on neurodevelopmental processes deregulated in high-risk LGG tumors ap-  
345 parent in our pathway analysis, such as the Reactome pathway *activation of anterior HOX*  
346 *genes in hindbrain development during early embryogenesis* that was enriched in mRNA signa-  
347 tures of high-risk tumors ( $FWER = 0.003$ ). In this pathway, developmental transcription factors  
348 *HOXA1*, *HOXA2*, *HOXA3*, *HOXA4* and *HOXC4* were co-activated with the two prognostic  
349 lncRNAs *HOXA10-AS* and *HOXB-AS2* in high-risk LGG tumors. An extended set of significantly  
350 enriched GO processes related to brain and central nervous system development was also  
351 found. These processes included 118 differentially expressed genes including known brain can-  
352 cer genes *EGFR*, *GLI1*, and *CNTNAP2*. The potential neurodevelopmental mechanisms altered  
353 in high-risk gliomas highlighted the HOX-associated lncRNAs as high-priority targets for further  
354 study.

355 *HOXA10-AS* transcript abundance appeared as highly hazardous in the LGG cohort (HR = 3.8,  
356 HR range = 2.38-5.19, Cox PH  $FDR = 5.0 \times 10^{-8}$ ) and a similar highly significant association was  
357 observed for *HOXB-AS2* (HR = 4.6, HR range = 2.2-5.1,  $FDR = 1.4 \times 10^{-6}$ ). When combined with  
358 *IDH* mutation status, zero-dichotomized transcript abundance profiles of *HOXA10-AS* and  
359 *HOXB-AS2* improved LGG prognostic models compared to univariate models with *IDH* mutation  
360 status alone (HR = 2.97, HR range = 2.0-4.4,  $FDR = 8.0 \times 10^{-7}$ , and HR = 2.15, HR range = 1.4-  
361 3.4,  $FDR = 0.002$ , respectively) (**Figure 5C-D**). In particular, the subset of ~10% LGG patients  
362 with no *IDH* mutations and high lncRNA abundance were stratified as the highest-risk group  
363 compared to all other patients. Thus, the two lncRNAs may represent novel molecular bi-  
364 omarkers of advanced LGGs whose discrete transcriptional activation patterns in combination  
365 with *IDH* mutation status indicate dismal outcome.

366 We quantified the transcriptional activation of *HOXA10-AS* and *HOXB-AS2* in lower-grade gli-  
367 omas and glioblastomas. Hierarchical transcriptome clustering of *HOXA10-AS* and *HOXB-AS2*

368 together with the 118 developmental genes across the LGG and GBM cohorts revealed a malign-  
369 nancy gradient of gliomas (**Figure 5E**). The major low-risk cluster of tumor transcriptomes con-  
370 tained LGGs with little or no transcription of the two prognostic lncRNAs. In contrast, the cluster  
371 of high-risk LGGs was clearly defined by an increased abundance of *HOXB-AS2* and *HOXA10-*  
372 *AS*. This high-risk set of LGGs was clustered together with GBMs, while GBMs were defined by  
373 even higher transcript abundance of the two prognostic lncRNAs as well as oncogenes such as  
374 *EGFR* and *GLI1*. In LGG, *HOXB-AS2* and *HOXA10-AS* were characterized by bimodal tran-  
375 script abundance: high transcript abundance was observed in few tumors (19% and 21% re-  
376 spectively), and silencing with zero transcript abundance of the two lncRNAs in the majority of  
377 tumors. Further, the majority of GBM tumors showed high transcript abundance of *HOXB-AS2*  
378 (68%) and *HOXA10-AS* (70%) and their overall transcript abundance was higher in GBMs than  
379 in LGGs (**Supplementary Figure 5**), indicating that HOX-antisense lncRNA expression posi-  
380 tively correlated with tumor grade. *HOXB-AS2* and *HOXA10-AS* were not significant prognostic  
381 in the GBM cohort, perhaps owing to the overall poor prognosis of these advanced tumors  
382 (**Supplementary Figure 6**). This neurodevelopmental gene signature may represent a tran-  
383 scriptomic subtype of LGG that is marked by discrete transcriptional activation of the two HOX-  
384 antisense lncRNAs with prognostic relevance and functional roles.

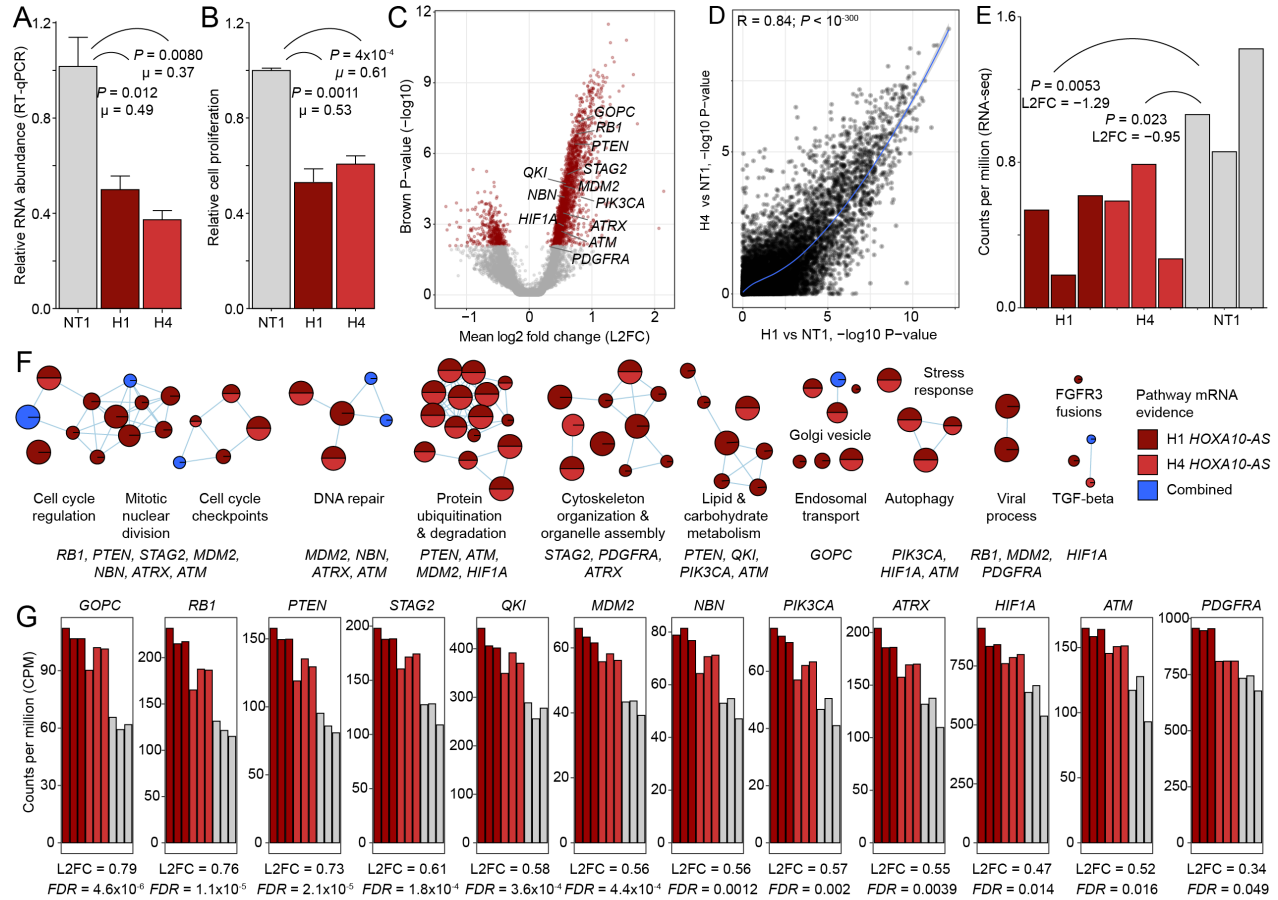

**Figure 6. *HOXA10-AS* knockdown in patient-derived GBM caused reduced cell proliferation and deregulation of cell cycle genes and glioma drivers.** **A.** siRNA knockdown of *HOXA10-AS* caused its reduced transcript abundance, as shown by RT-qPCR. Knockdown was performed in triplicates with two siRNAs (H1, H4) targeting the lncRNA and a non-targeting control siRNA (NT1). Significance (Welch T-test) and normalized mean values  $\mu$  are shown. **B.** *HOXA10-AS* knockdown caused reduced cell proliferation on day six post-transfection. **C.** Down-regulation of *HOXA10-AS* in siRNA experiments was confirmed using RNA-seq. **D.** Transcriptome-wide changes induced by the two siRNAs (H1, H4) were strongly correlated. Pearson correlation and loess trendline are shown. **E.** Volcano plot shows protein-coding genes with significant mRNA abundance changes in *HOXA10-AS*-inhibited cells. High-confidence glioma genes are highlighted. **F.** *HOXA10-AS*-inhibited cells showed deregulation of biological processes (ActivePathways  $FWER < 0.05$ ). Enrichment map shows enriched pathways as a network with nodes as pathways and edges connecting pathways with many shared genes. Node color indicates the siRNA experiment that led to differential expression of the pathway. **G.** *HOXA10-AS* inhibition caused transcriptional activation of glioma driver genes. FDR-adjusted Brown P-values and mean log2 fold-change values (L2FC) are shown.

385

386 ***HOXA10-AS* knockdown in patient-derived glioblastoma cells reduces proliferation and**  
 387 **deregulates cell cycle genes and glioma drivers**

388 The prognostic and pathway associations of *HOXA10-AS* transcript abundance prompted us to  
 389 investigate this lncRNA functionally. We performed a siRNA-mediated knockdown experiment of  
 390 *HOXA10-AS* followed by a six-day cell proliferation experiment using the primary patient-derived  
 391 GBM cell line G797 [53, 54]. To minimize off-target effects on the protein-coding gene *HOXA10*  
 392 antisense to the lncRNA, we used two siRNAs against the unique exon three of the lncRNA.

393 siRNA-mediated inhibition of *HOXA10-AS* led to two-fold reduction in transcript abundance of  
394 the lncRNA relative to non-targeted controls (T-test,  $P \leq 0.020$ ; **Figure 6A**). *HOXA10-AS*-inhib-  
395 ited cells showed ~40% lower cell proliferation at the 6-day timepoint ( $P \leq 0.0011$ ; **Figure 6B**).  
396 Transcriptional inhibition of *HOXA10-AS* and the resulting reduction in cell proliferation was ro-  
397 bustly observed in experiments conducted with either of the two targeting siRNAs. These find-  
398 ings indicate the function of *HOXA10-AS* in regulating cell proliferation in glioma and confirm a  
399 recent report on this lncRNA [55].

400 To further understand the role of *HOXA10-AS* in the hallmark pathways of glioma, we con-  
401 ducted whole-transcriptome RNA sequencing (RNA-seq) of *HOXA10-AS* depleted cells three  
402 days after siRNA transfection. We found a pronounced transcriptional response of 2,428 differ-  
403 entially expressed genes in *HOXA10-AS*-inhibited cells relative to non-targeted controls (Brown  
404  $FDR < 0.05$ , log<sub>2</sub> fold-change  $> 1.2$  using TREAT [56]; **Figure 6C**). The two targeting siRNA in-  
405 duced highly correlated transcriptome-wide changes (Pearson correlation test,  $R = 0.84$ ,  $P < 10^{-300}$ )  
406 and confirmed reduced transcript abundance of *HOXA10-AS* in siRNA-treated cells ( $P <$   
407  $0.023$ , L2FC  $< -0.95$ ; **Figure 6D-E**). We interpreted the transcriptomic changes induced by  
408 *HOXA10-AS* knockdown using pathway enrichment analysis and found 84 biological processes  
409 and molecular pathways enriched in the differentially expressed genes ( $FWER < 0.05$  from Ac-  
410 tivePathways [52]; **Figure 6F**). The pathways and processes were associated with 2,108 differ-  
411 entially expressed genes through the sensitive data fusion approach implemented in Active-  
412 Pathways. Known cancer genes were significantly enriched (137 observed vs 91 expected,  
413 Fisher's exact  $P = 2.4 \times 10^{-7}$ ) and included 12 up-regulated genes that are well recognized in the  
414 biology and mutational driver landscape of glioma (*GOPC*, *RB1*, *PTEN*, *STAG2*, *QKI*, *MDM2*,  
415 *NBN*, *PIK3CA*, *ATRX*, *HIF1A*, *ATM*, *PDGFRA*; **Figure 6G**) [35, 57, 58]. For example, the en-  
416 riched GO process *regulation of mitotic cell cycle* ( $FWER = 0.03$ ) provides an explanation to our  
417 observed phenotype of reduced glioma cell proliferation and implicates *HOXA10-AS* in the tran-  
418 scriptional rewiring of cell proliferation pathways. 128 genes of this pathway were deregulated in  
419 *HOXA10-AS* inhibited cells, including two upregulated tumor suppressors *RB1* and *PTEN*. Addi-  
420 tional enriched pathway themes such as DNA repair (*MDM2*, *NBN*, *ATRX*, *ATM*), protein ubiqui-  
421 tination (*PTEN*, *ATM*, *MDM2*, *HIF1A*), lipid metabolism (*PTEN*, *QKI*, *PIK3CA*, *ATM*) and TGF-  
422 beta signaling (*HIF1A*) suggest further roles of *HOXA10-AS* in mediating cell proliferation in gli-  
423 oma. Finally, we asked whether our observed transcriptional and proliferative differences of  
424 *HOXA10-AS* depleted cells would be explained by the antisense homeobox gene *HOXA10* that

425 modulates the tumorigenic potential of glioblastoma stem cells [59]. *HOXA10* showed no signifi-  
426 cant differences in transcript abundance in *HOXA10-AS* depleted cells compared to control-  
427 transfected cells in RNA-seq data and RT-qPCR assays (**Supplementary Figure 7**), suggesting  
428 that our functional and transcriptional evidence of altered cell proliferation is specific to the  
429 lncRNA *HOXA10-AS* and is not significantly confounded by any off-target effects of our knock-  
430 down experiment. In summary, these findings provide functional evidence to one of our pre-  
431 dicted prognostic lncRNAs as a regulator of hallmark cancer processes in glioma.

432

## 433 **DISCUSSION**

434 The current knowledge of cancer driver genes and molecular classifiers is primarily derived from  
435 the protein-coding genome while the vast non-coding genome remains understudied. Our find-  
436 ings of lncRNAs as prognostic factors in multiple cancer types are consistent with the increasing  
437 appreciation of lncRNAs in diverse cellular processes and human diseases. Our study highlights  
438 a facet of the non-coding genome that has great potential for basic and translational discover-  
439 ies. Our machine learning analysis identified a subset of lncRNAs as robust predictors of patient  
440 survival in cross-validation experiments, suggesting that these transcripts should be further  
441 evaluated as prognostic biomarkers in diverse molecular datasets. To establish one lncRNA as  
442 a *bona fide* modulator of cancer hallmark processes, we functionally validated a prominent can-  
443 didate lncRNA *HOXA10-AS* in patient-derived glioblastoma cells and observed significantly re-  
444 duced cell viability upon lncRNA depletion, differential expression of glioma driver genes as well  
445 as transcriptome-wide changes enriched in proliferative, DNA damage response and metabolic  
446 pathways. These data suggest further functional and mechanistic experiments to validate  
447 *HOXA10-AS* as a potential therapeutic target. The integrative analysis and experimental valida-  
448 tion data lend confidence to our overall catalogue of lncRNAs. However, our analysis remains  
449 inconclusive to whether all or most candidate lncRNAs are functional in cancer cells or alterna-  
450 tively represent passive indicators of transcriptional activity. On the one hand, functionally inac-  
451 tive ‘passenger’ lncRNAs may be modulated transcriptionally or epigenetically as part of global  
452 gene regulatory programs that control hallmark cancer pathways such as proliferation. These  
453 markers of large regulatory programs would be expected to outperform any prognostic models  
454 based on individual protein-coding genes. For example, we observed that a subset of lncRNAs  
455 with hazardous risk profiles were sharply up-regulated in high-risk tumors and completely si-  
456 lenced in lower-risk tumors. These lncRNAs may be epigenetically repressed in the majority of



457 tumors and aberrantly activated in the high-risk minority group of tumors. Such a binary zero-  
458 dichotomization pattern is a promising property for biomarker development owing to a natural  
459 threshold separating high-risk and low-risk patients, although further validation in independent  
460 cohorts is required. On the other hand, a subset prognostic lncRNAs may be functional in cells  
461 and act as functional 'drivers' that activate oncogenic processes or inhibit tumor suppressive  
462 pathways through interactions with DNA, RNA and proteins. However, further experiments are  
463 needed to validate the prognostic lncRNAs as drivers of cancer phenotypes, such as large-scale  
464 genome editing screens that are increasingly targeting the non-coding genome encoding  
465 lncRNAs [60]. Our findings of prognostic lncRNAs are ultimately limited by the transcriptional  
466 and clinical information that was available for inference and validation. The TCGA tumor cohorts  
467 that we studied are under-represented in rare and early-stage malignancies and the available  
468 clinical variables and patient follow-up data are limited. It is plausible that lncRNA transcription  
469 in cancers is associated with unrecorded environmental, genetic and phenotypic variables that  
470 confounded our inference of prognostic markers. We used RNA-seq datasets that had been op-  
471 timized for mRNA quantification and thus additional lncRNAs likely remain uncharacterized or lie  
472 below the detection limit of RNA-sequencing protocols. Future multi-omics datasets with deep  
473 clinical profiles of patients will enable further discoveries and validation of non-coding RNAs.  
474 Our study is a step towards systematic characterization of non-coding RNA genes as molecular  
475 biomarkers and functional regulators of oncogenesis.

476

477 **ACKNOWLEDGMENTS**

478 We would like to thank Dr. Fritz Roth, Dr. Hansen He, Hassaan Maan and members of the  
479 Reimand lab for thoughtful discussions. This research was partially funded by the Natural Sci-  
480 ences and Engineering Research Council of Canada (NSERC) Discovery Grant to J.R., MBP  
481 Excellence Award to K.I. from the University of Toronto Department of Medical Biophysics, and  
482 the Ontario Institute for Cancer Research (OICR) Investigator Award to J.R, and the OICR Brain  
483 Tumour Translational Research Initiative to J.R., D.S., and P.B.D. Funding from the OICR is  
484 provided by the Government of Ontario. The results published here are in part based upon data  
485 generated by the TCGA Research Network: <https://www.cancer.gov/tcga>.

486 **AUTHOR CONTRIBUTIONS**

487 K.I. led computational analyses and developed the methodology. K.I. and C.L. analyzed the  
488 data. K.I., L.J., D.S., and J.R. interpreted the data. L.J. and R.T. conducted experiments. D.S.  
489 supervised the experiments. K.I. and J.R. conceived and designed the study. F.C. and P.B.D.  
490 contributed patient-derived cell lines and know-how. J.R. supervised the study. K.I. and J.R.  
491 wrote the manuscript with input from all authors. All authors approved the final manuscript.

492 **CONFLICT OF INTEREST**

493 The authors declare no conflict of interest.

494

## 495 **METHODS**

### 496 Data Collection

497 We downloaded RNA-seq data of the TCGA project for 32 tumor types from the Genome Data  
498 Commons (<https://portal.gdc.cancer.gov>). Overall survival data was retrieved from the latest  
499 publication of the TCGA PanCanAtlas project [22, 29]. We selected 29 cancer types where co-  
500 horts of at least 50 patients were available. We only analyzed one tumor specimen per patient  
501 and maintained the tumor with a smaller TCGA serial number for patients with multiple speci-  
502 mens. Additional information on patient clinical variables such as alcohol consumption, smoking  
503 status and molecular subtypes was downloaded using the R package TCGABiolinks [47]. We  
504 intersected clinical information and transcript abundance data for each cancer type and retained  
505 patient cohorts where matched datasets were available. For lncRNA annotations, we down-  
506 loaded the latest comprehensive annotation set of 5' lncRNA CAGE peaks from the FANTOM-  
507 CAT project [2]. We studied 5,785 lncRNAs that were annotated by FANTOM-CAT and the  
508 ENSEMBL database and for which RNA abundance data were available in TCGA .

### 509 Processing TCGA RNA-seq data

510 For all cancer types of the TCGA dataset, we retrieved processed RNA-seq files as FPKM-UQ  
511 measurements and raw counts from the Genome Data Commons website. lncRNAs often have  
512 low transcript abundance and we first removed the lncRNAs that were not detected in any pa-  
513 tient tumor sample across all cohorts in TCGA RNA-seq data (n=94). Further, we evaluated me-  
514 dian transcript abundance of each lncRNA in every cancer type and included two classes of  
515 lncRNAs in further analyses. First, we included lncRNAs with a median FPKM-UQ above 0.  
516 Second, we also included a set of lncRNAs with binary transcript abundance profiles. These  
517 lncRNAs showed median transcript abundance of zero FPKM-UQ representing the majority of  
518 tumor samples, while a minority of tumor samples (at least 15) showed transcript abundance of  
519 at least 100 FPKM-UQ. To evaluate tissue specificity of lncRNA transcription profiles, we used  
520 the UMAP (Uniform Manifold Approximation and Projection) dimension reduction method [31]  
521 and the corresponding R package to perform clustering of log<sub>1p</sub>-transformed FPKM-UQ lncRNA  
522 transcript abundance values across the entire TCGA cohort.

### 523 Training survival models and evaluating generalizability

524 For each cancer type, we evaluated the association between all lncRNAs and overall patient  
525 survival. We also evaluated the association between available clinical variables and overall sur-  
526 vival for comparison. For each cancer type, we split samples randomly into two groups, with  
527 70% as the training set and 30% as the test set. Patients within each training cohort were me-  
528 dian-dichotomized by the transcript abundance of each lncRNA. In case of lncRNAs with me-  
529 dian transcript abundance of zero, patients with lncRNA transcript abundance above zero were  
530 labeled as high-abundance and those with zero abundance were labeled as low-abundance.  
531 We used the elastic net framework with a Cox proportional hazards link function to train patient  
532 survival models and to perform feature selection. All univariate models were built using the R  
533 package “survival”. Elastic net modelling was performed using the R package “glmnet” where  
534 the penalty hyperparameter  $\lambda$  was determined by fivefold cross-validation within each training  
535 set. We used the fixed hyperparameter value  $\alpha=0.5$  for the elastic net model. We employed  
536 1000-fold cross-validation with 70/30% random split of training and testing data for each cancer  
537 type. Within each fold, initial elastic-net multivariate models included as predictors all lncRNAs  
538 that were univariately survival-associated in the training set (univariate Cox proportional-haz-  
539 ards (PH)  $P<0.05$ ). Feature selection during model fitting and regularization determined a non-  
540 redundant subset of lncRNAs as predictors in the training data. Subsequent cross-validation  
541 evaluated the models using concordance index (c-index), an accuracy measure extended to  
542 survival analysis [33]. The multivariate Cox PH elastic net models were then applied to the re-  
543 maining 30% of the test set to obtain a concordance index (c-index) using the R package “sur-  
544 vcomp”. Besides lncRNA-based predictors, clinical variables that were available for each cancer  
545 types were also used to build a multivariate model using the training set and applied on test set  
546 in a similar manner. Of clinical variables, patient age was always available for all tumor types in  
547 TCGA, while other features such as tumor stage, grade and ethnicity were available for a subset  
548 of cancer types. Lastly, the available clinical variables were integrated with the lncRNA tran-  
549 script abundance profiles selected by the elastic net into one multivariate model (the combined  
550 model) that was also trained and tested separately. Thus, there were three distinct performance  
551 metrics (c-indices) obtained overall for each round of training. The entire outlined process was  
552 repeated 1000 times, randomly splitting the data at each iteration. For each cancer type, we  
553 subsequently compared the three distributions of c-indices using the two-sided U test to a set of  
554 reference models that only utilized clinical variables for survival predictions. Finally, to assess  
555 the performance of our models on random data, we shuffled survival outcome across all TCGA  
556 patients of a given cancer type while maintaining the order of all predictor variables (lncRNAs

557 and clinical variables). This permutation strategy disrupted the association of survival infor-  
558 mation and molecular and clinical predictors, The analysis of this simulated data allowed us to  
559 evaluate the statistical calibration of our method. We generated 100 random datasets and con-  
560 ducted 100 cross-validations on each of these datasets. We compared c-indices between mod-  
561 els fitted using shuffled outcome data and real outcome data using a two-sided U-test. As ex-  
562 pected, we found considerably lower performance of our models on random data that centered  
563 on the expected performance values of random predictors ( $c \approx 0.5$ ), indicating that our models  
564 were well calibrated and not prone to statistical inflation and overfitting.

### 565 Selecting top prognostic lncRNAs

566 To prioritize lncRNAs, we summarized the number of times each lncRNA was maintained as a  
567 prognostic feature in all the elastic-net survival models across cross-validations. To obtain the  
568 most consistent candidates, we considered the lncRNAs in each cancer type that were included  
569 in at least 50% ( $\geq 500/1000$ ) of iterations. This list of lncRNAs was further evaluated individually.  
570 For validation, we fitted multivariate Cox PH models using each lncRNA candidate together with  
571 available clinical variables in respective cancer cohorts to confirm that the prognostic effect of  
572 lncRNAs remained present even when accounting for common clinical variables. We also evalu-  
573 ated Schoenfeld residuals to confirm that the proportionality assumption of the Cox-PH model  
574 was met (**Supplementary Table 3**). Finally, we removed a small subset of candidate lncRNAs  
575 that showed opposing hazards in different cancer types. To evaluate the performance of individ-  
576 ual lncRNA candidates within the TCGA dataset, we conducted a second round of internal  
577 cross-validation. Using one lncRNA candidate at a time, we split the respective cancer patient  
578 cohort into training (70%) and testing samples (30%) as described above. Univariate Cox PH  
579 models were fitted and evaluated on the test datasets to obtain a distribution of c-indices for  
580 each lncRNA candidate. Similarly, we conducted internal cross-validation of clinical variables as  
581 a baseline reference, by fitting multivariate Cox PH models and evaluating their performance on  
582 test sets using the c-index. We also compared combined models where clinical variables were  
583 used together with lncRNA transcript abundance profiles for patient survival prediction. These  
584 distributions of c-indices were compared using the two-sided Wilcoxon rank-sum tests and re-  
585 sulting P-values were adjusted using the Benjamini-Hochberg false discovery rate (FDR) proce-  
586 dure [61].

### 587 Validating prognostic lncRNAs in additional cohort of hepatocellular carcinoma

588 We used an independent dataset of transcriptomics and patient clinical information available in  
589 the ICGC/TCGA Pan-cancer Analysis of Whole Genomes (PCAWG) project [20]. We focused  
590 on the liver cancer cohort and removed any patient samples profiled in the TCGA project to cre-  
591 ate an entirely independent validation cohort comprising primarily of liver cancers (hepatocellu-  
592 lar carcinomas, HCC) of Japanese individuals [62], resulting in a cohort of 42 tumors with uni-  
593 formly processed RNA-seq data [63]. Twelve lncRNAs identified in the TCGA LIHC cohort were  
594 queried for prognostic signals in the validation cohort. Within the validation cohort, we consid-  
595 ered lncRNAs with FPKM-UQ values greater than 0.05 measured in at least five patients. We  
596 dichotomized patients by lncRNA transcript abundance as described above. To evaluate signifi-  
597 cance of patient survival associations, we fitted univariate Cox-PH models with binary predictors  
598 reflecting lncRNA transcript abundance and plotted their Kaplan-Meier survival curves using the  
599 'Survival' and 'survminer' packages in R. We considered those lncRNAs with nominal P-values  
600 from Wald tests as significant ( $P < 0.05$ ).

#### 601 Comparing survival associations of lncRNAs and adjacent protein-coding genes

602 We identified protein-coding genes that were located within 10,000 bps of lncRNA genes using  
603 the Genome Reference Consortium Human Build 38 (GRCh38) and the bedtools software [64].  
604 We identified pairs of 96 lncRNAs and 147 protein-coding genes that we evaluated further for  
605 differences in patient survival associations. For each pair, we fitted univariate Cox-PH models  
606 using median-dichotomized lncRNA transcript abundance labels as described above, and com-  
607 pared these to Cox-PH models fitted using median-dichotomized transcript abundance values of  
608 corresponding protein-coding genes. We compared the sets of two models using cross-valida-  
609 tion performance (i.e., c-indices) and also model fits (i.e., FDR-adjusted  $P$ -values from the Wald  
610 test). We also fitted multivariate models using transcript abundance values of both the protein-  
611 coding gene and the lncRNA gene, and compared those models to univariate models of protein-  
612 coding genes using ANOVA. Multiple testing correction was performed using the Benjamini-  
613 Hochberg FDR procedure.

#### 614 lncRNA associations with clinical and molecular tumor subtypes

615 We conducted a systematic analysis of clinical and molecular subtypes of TCGA tumors using  
616 data curated in the R package TCGABiolinks [47]. These clinical and molecular features in-  
617 cluded basic clinical variables included in our elastic net framework described above (patient  
618 age, sex and tumor stage and/or grade, *etc.* as available in TCGA), and additional variables



619 such as molecular subtypes, specific prognostic mutations and tumor histology annotations.  
620 These comprehensive sample-specific annotations were only available for 12/21 cancer types  
621 for which high-confidence prognostic lncRNAs were predicted, and we further analyzed only the  
622 113/179 lncRNAs predicted in these cancer types. For each lncRNA, we evaluated whether the  
623 transcript abundance was significantly associated with clinical and molecular features. Dichoto-  
624 mized lncRNA transcript abundance profiler (high vs. low) were compared to clinical and molec-  
625 ular features using chi-squared tests as most clinical and molecular variables per patient were  
626 recorded as binary categories. For numerical clinical and molecular variables (such as age), we  
627 analyzed the spearman correlation between the variables and lncRNA transcript abundance.  
628 We adjusted P-values for multiple testing using the Benjamini–Hochberg FDR procedure and  
629 selected significant associations ( $FDR < 0.05$ ). All clinical features from the analysis that were  
630 significantly associated with our lncRNA candidates were also evaluated for associations with  
631 overall patient survival. For the lncRNAs associated with at least one clinical or molecular fea-  
632 ture, we extracted the corresponding (c-index) from a Cox-PH model (model 1). Next, we fitted  
633 univariate Cox-PH models with the clinical or molecular feature as a predictor of overall patient  
634 survival within the respective cancer cohort. For each model we extracted its c-index, HR and  
635 Wald test  $P$ -value (model 2). Finally, we fitted a multivariate model with both the clinical or mo-  
636 lecular feature with the lncRNA transcript abundance profile that it was associated with (model  
637 3). This allowed us quantify the combination of lncRNA transcript abundance and previously an-  
638 notated clinical and molecular features. Tests with Cox PH models were defined as:

639 Test #1: Anova (model 1, model 3), to assess the improvement of the survival associa-  
640 tion when using both lncRNA transcript abundance and clinical/molecular features as  
641 predictors, compared to lncRNA-based predictors alone.

642 Test #2: Anova (model 2, model 3), to assess the improvement of the survival associa-  
643 tion when using both lncRNA transcript abundance and clinical/molecular features as  
644 predictors, compared to clinical and molecular features as predictors alone.

645 To obtain the final list of lncRNA-associated clinical and molecular features that showed signifi-  
646 cant improvement in survival association in combination with lncRNA transcript abundance, we  
647 considered two criteria: a significant likelihood ratio test ( $FDR < 0.05$ ) from the Test #2 above,  
648 and an absolute increase in c-index in cross-validation experiments.

649 Pathway enrichment analysis of lncRNA-associated protein-coding genes

650 For each prognostic lncRNA, tumors of a given type were first classified as high-risk or low-risk,  
651 based on median dichotomization of the lncRNA as described above. We conducted differential  
652 transcript abundance analysis to identify protein-coding genes that were differentially expressed  
653 in high-risk tumors. We used raw sequencing read counts from the TCGA RNA-seq datasets  
654 and applied the Limma method for differential transcript abundance analysis [65]. We consid-  
655 ered all protein-coding genes with a filter on effect size (absolute fold change (FC) > 2,  $FDR <$   
656 0.05). We highlighted known cancer genes curated in the COSMIC Cancer Gene Census da-  
657 taset [35]. We then used g:Profiler web server [66] to identify significantly enriched Reactome  
658 pathways and GO biological processes in the differentially expressed protein-coding genes as-  
659 sociated with each lncRNA. We filtered gene sets (pathways and processes) to only include at  
660 least 10 and less than 250 annotated genes and a minimum of five pathway-annotated genes  
661 differentially expressed in the lncRNA-stratified set of high-risk tumors. Pathway enrichments  
662 were filtered by statistical significance ( $FDR < 0.05$  in g:Profiler). An additional stringent version  
663 of this analysis was conducted for the 12 prognostic lncRNAs in LGG. First, protein-coding  
664 genes with differential mRNA abundance were detected in the LGG cohort by specifically ac-  
665 counting for IDH mutation status as covariate in the Limma framework. Second, pathway enrich-  
666 ment analysis was conducted using the data fusion approach implemented in the ActivePath-  
667 ways package [52]. ActivePathways prioritized protein-coding genes that showed differential  
668 transcript abundance signals for multiple prognostic lncRNAs in the LGG cohort. All nominally  
669 significant genes were considered for input pathway enrichment analysis according to default  
670 parameter settings of ActivePathways (gene-based Brown  $P < 0.1$ ). Resulting enriched pathways  
671 were adjusted for multiple-testing correction and filtered according to default settings (Active-  
672 Pathways, Holm family-wise error rate ( $FWER$ ) < 0.05). Pathway enrichment maps were built in  
673 Cytoscape using standard procedures and manually curated for groups of related pathways as  
674 functional themes [50]. For LGG, we focused on a subset of neurodevelopmental pathways and  
675 associated protein-coding genes for further enquiry into the top prognostic lncRNAs in LGG,  
676 *HOXA10-AS* and *HOXB-AS2*. We generated heatmaps to summarize the expression of these  
677 genes in LGG and GBM using the “ComplexHeatmap” package [67]. The heatmap was gener-  
678 ated using log<sub>1p</sub> transformed FPKM-UQ values and a hierarchical clustering with Pearson cor-  
679 relation distance was applied. Relative risk was calculated for LGG patients using a multivariate  
680 Cox-PH model accounting for dichotomized transcript abundances of both *HOXB-AS2* and  
681 *HOXA10-AS*.

682 *Cell Culture of patient-derived GBM cell lines*

683 The human glioma G797 cells were prepared as described previously as a bulk patient-derived  
684 cell cultures [53, 54]. We selected the G797 patient-derived cell line as a suitable candidate for  
685 our experiments based on previously generated RNA-seq data [53] that indicated a relatively  
686 high native transcript abundance of lncRNA *HOXA10-AS* in these cells. G797 cells were main-  
687 tained in serum-free NeuroCult™ NS-A Basal Medium (STEMCELL Technologies Canada Inc)  
688 supplemented with N2, B27, EGF (10 ng/ml), and FGF-2 (10 ng/ml), as described previously  
689 [68].

#### 690 *siRNA mediated knockdown of HOXA10-AS*

691 A TriFECTa DsiRNA kit (hs.Ri.HOXA10-AS.13) containing one non-targeting control DsiRNA  
692 (NT1) and DsiRNAs targeting *HOXA10-AS*, and an additional DsiRNA targeting *HOXA10-AS*  
693 (CD.Ri.209973.13.8) were purchased from Integrated DNA Technologies. The targeting se-  
694 quences were: H1, AGACGATTTCAACTGAAGTAATGAA; and H4,  
695 GGTACCTGGAGACGATTTCAACTGA. Transfection of DsiRNAs was performed using Lipofec-  
696 tamine RNAiMAX Reagent (Thermo Fisher Scientific) as per manufacturer's protocol. Exon3 of  
697 *HOXA10-AS* is directly antisense to protein-coding exons of *HOXA10*. To avoid off-target effects  
698 of knocking down *HOXA10-AS*, we purposefully avoided this region in siRNA design and in-  
699 stead selected siRNAs targeting exon2 of *HOXA10-AS*, a region unique to *HOXA10-AS* and not  
700 overlapping with *HOXA10*. We confirmed successful knock-down of *HOXA10-AS* by RT-PCR  
701 using primers flanking exon2 of *HOXA10-AS*. With depletion of *HOXA10-AS* we did not observe  
702 a significant change in *HOXA10* transcript abundance in either our RT-qPCR or RNA-seq exper-  
703 iments.

#### 704 *PrestoBlue Cell Viability assay*

705 PrestoBlue Cell Viability assays (A13262, Thermo Fisher Scientific) were performed as per  
706 manufacturer's protocol. Briefly, 5,000 cells were seeded into each well of 96-well plates on day  
707 0 of DsiRNA transfection. On each day of viability assay, cells were incubated with 100ul fresh  
708 complete medium with the PrestoBlue reagent for 40 min. Then the fluorescence readout was  
709 obtained using a SpectraMax Gemini EM Microplate Reader (Molecular Devices) with the exci-  
710 tation/emission wavelengths set at 544/590 nm. Cell viability is reported at the 6-day timepoint  
711 of the experiment.

#### 712 *RNA isolation, cDNA synthesis, and real-time QPCR analysis*

713 RNA samples were extracted from cells three days post DsiRNA transfection using Quick-RNA  
714 Microprep Kit (Zymo Research), treated with DNase I (Zymo Research), quantified using the  
715 Qubit, and reverse transcribed into cDNA using SuperScript IV VILO (Invitrogen). Primers were  
716 designed to span and/or overlap exon junctions using Primer3Plus. Primers were validated  
717 against a standard curve and relative mRNA expression levels were calculated using the com-  
718 parative Ct method normalized to PPIB mRNA [69]. Real-time quantitative PCR (qRT-PCR) re-  
719 actions were performed on an CFX384 (Biorad) in 384-well plates containing 12.5 ng cDNA,  
720 150 nM of each primer, and 5 µl of 2X SensiFAST SYBR No-ROX kit (Bioline) in a 10 µl total  
721 volume. The following RT-qPCR primers were used: *HOXA10-AS* (NR\_046609.1; forward:  
722 CAGAGAGAAGGGTGGAGGTG; reverse: CTCAGGAGCCTCGTGTCTTT), *HOXA10*  
723 (NM\_018951.3; forward: CCTTCCGAGAGCAGCAAAG; reverse:  
724 TGCGTTTTACCTTTGGAAT), control gene *PPIB* (NM\_000942.4; forward:  
725 GGAGATGGCACAGGAGGAA; reverse: GCCCGTAGTGCTTCAGTTT).

726 RNA-seq libraries were prepared using Illumina TruSeq Stranded mRNA Sample Prep Kit  
727 (20020594) as per manufacturer's protocol. The barcoded cDNA libraries were then checked  
728 with Agilent Fragment Analyzer for fragment size and quantified with ddPCR (BioRad) using  
729 ddPCR™ Supermix for Probes (No dUTP) (BioRad cat#1863023) running in BioRad CFX96  
730 Touch Real-Time PCR Detection System. The quality checked libraries were then loaded on a  
731 NextSeq 500 running with Nextseq 500/550 high output v2.5 75 cycle kit (Single Read 75 cy-  
732 cles, Cat#: 20024906). The real-time base call (BCL) files were converted to FASTQ files using  
733 Illumina bcl2fastq2 (v2) conversion software.

#### 734 Analysis of transcriptomics (RNA-seq) data

735 RNA-seq data processing analysis was carried out using standard procedures and custom R  
736 scripts. First, sequenced reads were aligned to the human reference genome GRCh38 and  
737 passed through a quality assessment pipeline using the package Rsubread [70]. High read  
738 mappability was observed in the dataset and all replicates were included. Next, the mapped  
739 reads were counted across all genes using the edgeR R package [71]. Counts-per-million  
740 (CPM) values were calculated for all genes to normalize read counts resulting from per-replicate  
741 differences of sequencing depths. We focused on transcript abundance values of consensus  
742 coding sequence genes (CCDS) database V22 [72] and filtered other classes of genes from our  
743 dataset. We also filtered lowly expressed genes and only included genes with above-baseline  
744 transcript abundance (CPM > 0.5) in at least two replicates. Next, trimmed mean of M values

745 normalization was performed to remove composition bias between libraries [73]. Two design  
746 matrices for comparing the three technical replicates corresponding to distinct siRNAs (H1 and  
747 H4, respectively) against the three replicates of the control siRNA (NT1) were generated. Tran-  
748 script abundance values were subsequently transformed with the voom procedure of the limma  
749 package [65]. Differential transcript abundance analysis was conducted by first fitting a linear  
750 model to the voom-transformed CPM values. Next, an empirical Bayes shrinkage method was  
751 performed on the variances and a statistical test using a pre-defined a fold-change (FC) thresh-  
752 old ( $\text{abs}(\log_2(\text{FC})) > 1.2$ ) was conducted to estimate statistical significance of differential tran-  
753 script abundance, using the TREAT method [56]. The resulting P-values from the two siRNA ex-  
754 periments (H1 vs NT1; H4 vs NT1) were merged using the Brown method [74] to prioritize  
755 genes differentially regulated in both *HOXA10-AS* depletion experiments and to deprioritize spe-  
756 cific off-targets of each of the siRNAs. The merged p-values were corrected for multiple testing  
757 using the Benjamini-Hochberg procedure and significant genes were selected ( $FDR < 0.05$ ). To  
758 evaluate the agreement of the two siRNAs, we conducted a Pearson correlation test of log10-  
759 transformed p-values from the two siRNA experiments. We confirmed that a very small number  
760 of significant genes showed opposite fold-changes in the two experiments (3 genes or 0.12%),  
761 indicating a strong agreement of the two siRNAs (H1, H4) in depleting *HOXA10-AS* and an  
762 overall lack of major off-target effects. Pathway enrichment analysis of differentially expressed  
763 genes was conducted using ActivePathways [48] with all genes and corresponding P-values  
764 from the two siRNA experiments (H1 vs NT1; H4 vs NT1) as input and default parameter set-  
765 tings ( $FWER < 0.05$ ). Enrichment maps were generated in Cytoscape using the EnrichmentMap  
766 app and standard protocols [47]. Pathway-annotated genes from the ActivePathways analysis  
767 were curated for known glioma genes using the COSMIC Cancer Census database [35] and  
768 previous GBM sequencing studies [57, 58].

769

770 REFERENCES

- 771 1. Iyer MK, Niknafs YS, Malik R, Singhal U, Sahu A, Hosono Y, Barrette TR, Prensner JR,  
772 Evans JR, Zhao S, et al: **The landscape of long noncoding RNAs in the human**  
773 **transcriptome.** *Nat Genet* 2015, **47**:199-208.
- 774 2. Hon CC, Ramilowski JA, Harshbarger J, Bertin N, Rackham OJ, Gough J, Denisenko E,  
775 Schmeier S, Poulsen TM, Severin J, et al: **An atlas of human long non-coding RNAs**  
776 **with accurate 5' ends.** *Nature* 2017, **543**:199-204.
- 777 3. Sarropoulos I, Marin R, Cardoso-Moreira M, Kaessmann H: **Developmental dynamics**  
778 **of lncRNAs across mammalian organs and species.** *Nature* 2019, **571**:510-514.
- 779 4. Batista PJ, Chang HY: **Long noncoding RNAs: cellular address codes in**  
780 **development and disease.** *Cell* 2013, **152**:1298-1307.
- 781 5. Ulitsky I, Bartel DP: **lincRNAs: genomics, evolution, and mechanisms.** *Cell* 2013,  
782 **154**:26-46.
- 783 6. Engreitz JM, Pandya-Jones A, McDonel P, Shishkin A, Sirokman K, Surka C, Kadri S,  
784 Xing J, Goren A, Lander ES, et al: **The Xist lncRNA exploits three-dimensional**  
785 **genome architecture to spread across the X chromosome.** *Science* 2013,  
786 **341**:1237973.
- 787 7. Gonzalez I, Munita R, Agirre E, Dittmer TA, Gysling K, Misteli T, Luco RF: **A lncRNA**  
788 **regulates alternative splicing via establishment of a splicing-specific chromatin**  
789 **signature.** *Nat Struct Mol Biol* 2015, **22**:370-376.
- 790 8. Tsai MC, Manor O, Wan Y, Mosammamaparast N, Wang JK, Lan F, Shi Y, Segal E, Chang  
791 HY: **Long noncoding RNA as modular scaffold of histone modification complexes.**  
792 *Science* 2010, **329**:689-693.
- 793 9. Kirk JM, Kim SO, Inoue K, Smola MJ, Lee DM, Schertzer MD, Wooten JS, Baker AR,  
794 Sprague D, Collins DW, et al: **Functional classification of long non-coding RNAs by**  
795 **k-mer content.** *Nat Genet* 2018, **50**:1474-1482.
- 796 10. Schmitt AM, Chang HY: **Long Noncoding RNAs in Cancer Pathways.** *Cancer Cell*  
797 2016, **29**:452-463.
- 798 11. Bussemakers MJ, van Bokhoven A, Verhaegh GW, Smit FP, Karthaus HF, Schalken JA,  
799 Debruyne FM, Ru N, Isaacs WB: **DD3: a new prostate-specific gene, highly**  
800 **overexpressed in prostate cancer.** *Cancer Res* 1999, **59**:5975-5979.
- 801 12. Wei JT, Feng Z, Partin AW, Brown E, Thompson I, Sokoll L, Chan DW, Lotan Y, Kibel  
802 AS, Busby JE, et al: **Can urinary PCA3 supplement PSA in the early detection of**  
803 **prostate cancer?** *J Clin Oncol* 2014, **32**:4066-4072.
- 804 13. Gupta RA, Shah N, Wang KC, Kim J, Horlings HM, Wong DJ, Tsai MC, Hung T, Argani  
805 P, Rinn JL, et al: **Long non-coding RNA HOTAIR reprograms chromatin state to**  
806 **promote cancer metastasis.** *Nature* 2010, **464**:1071-1076.
- 807 14. Teschendorff AE, Lee SH, Jones A, Fiegl H, Kalwa M, Wagner W, Chindera K, Evans I,  
808 Dubeau L, Orjalo A, et al: **HOTAIR and its surrogate DNA methylation signature**  
809 **indicate carboplatin resistance in ovarian cancer.** *Genome Med* 2015, **7**:108.
- 810 15. Gibb EA, Vucic EA, Enfield KS, Stewart GL, Lonergan KM, Kennett JY, Becker-Santos  
811 DD, MacAulay CE, Lam S, Brown CJ, Lam WL: **Human cancer long non-coding RNA**  
812 **transcriptomes.** *PLoS One* 2011, **6**:e25915.
- 813 16. Brunner AL, Beck AH, Edris B, Sweeney RT, Zhu SX, Li R, Montgomery K, Varma S,  
814 Gilks T, Guo X, et al: **Transcriptional profiling of long non-coding RNAs and novel**  
815 **transcribed regions across a diverse panel of archived human cancers.** *Genome*  
816 *Biol* 2012, **13**:R75.



- 817 17. Lanzos A, Carlevaro-Fita J, Mularoni L, Reverter F, Palumbo E, Guigo R, Johnson R:  
818 **Discovery of Cancer Driver Long Noncoding RNAs across 1112 Tumour Genomes:**  
819 **New Candidates and Distinguishing Features.** *Sci Rep* 2017, **7**:41544.
- 820 18. Rheinbay E, Nielsen MM, Abascal F, Wala JA, Shapira O, Tiao G, Hornshøj H, Hess JM,  
821 Juul RI, Lin Z, et al: **Analyses of non-coding somatic drivers in 2,693 cancer whole**  
822 **genomes.** *Nature* 2019.
- 823 19. Weinstein JN, Collisson EA, Mills GB, Shaw KR, Ozenberger BA, Ellrott K, Shmulevich I,  
824 Sander C, Stuart JM: **The Cancer Genome Atlas Pan-Cancer analysis project.**  
825 *Nature genetics* 2013, **45**:1113-1120.
- 826 20. The ICGC/TCGA Pan-Cancer Analysis of Whole Genomes Network: **Pan-cancer**  
827 **analysis of whole genomes.** *Nature* 2019.
- 828 21. Curtis C, Shah SP, Chin SF, Turashvili G, Rueda OM, Dunning MJ, Speed D, Lynch AG,  
829 Samarajiva S, Yuan Y, et al: **The genomic and transcriptomic architecture of 2,000**  
830 **breast tumours reveals novel subgroups.** *Nature* 2012, **486**:346-352.
- 831 22. Liu J, Lichtenberg T, Hoadley KA, Poisson LM, Lazar AJ, Cherniack AD, Kovatich AJ,  
832 Benz CC, Levine DA, Lee AV, et al: **An Integrated TCGA Pan-Cancer Clinical Data**  
833 **Resource to Drive High-Quality Survival Outcome Analytics.** *Cell* 2018, **173**:400-  
834 416 e411.
- 835 23. Uhlen M, Zhang C, Lee S, Sjostedt E, Fagerberg L, Bidkhori G, Benfeitas R, Arif M, Liu  
836 Z, Edfors F, et al: **A pathology atlas of the human cancer transcriptome.** *Science*  
837 2017, **357**.
- 838 24. Smith JC, Sheltzer JM: **Systematic identification of mutations and copy number**  
839 **alterations associated with cancer patient prognosis.** *Elife* 2018, **7**.
- 840 25. Yuan Y, Van Allen EM, Omberg L, Wagle N, Amin-Mansour A, Sokolov A, Byers LA, Xu  
841 Y, Hess KR, Diao L, et al: **Assessing the clinical utility of cancer genomic and**  
842 **proteomic data across tumor types.** *Nat Biotechnol* 2014, **32**:644-652.
- 843 26. Wang Z, Yang B, Zhang M, Guo W, Wu Z, Wang Y, Jia L, Li S, Cancer Genome Atlas  
844 Research N, Xie W, Yang D: **lncRNA Epigenetic Landscape Analysis Identifies**  
845 **EPIC1 as an Oncogenic lncRNA that Interacts with MYC and Promotes Cell-Cycle**  
846 **Progression in Cancer.** *Cancer Cell* 2018, **33**:706-720 e709.
- 847 27. Chiu HS, Somvanshi S, Patel E, Chen TW, Singh VP, Zorman B, Patil SL, Pan Y,  
848 Chatterjee SS, Cancer Genome Atlas Research N, et al: **Pan-Cancer Analysis of**  
849 **lncRNA Regulation Supports Their Targeting of Cancer Genes in Each Tumor**  
850 **Context.** *Cell Rep* 2018, **23**:297-312 e212.
- 851 28. Ali MM, Akhade VS, Kosalai ST, Subhash S, Statello L, Meryet-Figuire M,  
852 Abrahamsson J, Mondal T, Kanduri C: **PAN-cancer analysis of S-phase enriched**  
853 **lncRNAs identifies oncogenic drivers and biomarkers.** *Nat Commun* 2018, **9**:883.
- 854 29. Hoadley KA, Yau C, Hinoue T, Wolf DM, Lazar AJ, Drill E, Shen R, Taylor AM,  
855 Cherniack AD, Thorsson V, et al: **Cell-of-Origin Patterns Dominate the Molecular**  
856 **Classification of 10,000 Tumors from 33 Types of Cancer.** *Cell* 2018, **173**:291-304  
857 e296.
- 858 30. Zerbino DR, Achuthan P, Akanni W, Amode MR, Barrell D, Bhai J, Billis K, Cummins C,  
859 Gall A, Giron CG, et al: **Ensembl 2018.** *Nucleic Acids Res* 2018, **46**:D754-D761.
- 860 31. McInnes L, Healy H, Melville J: **UMAP: Uniform Manifold Approximation and**  
861 **Projection for Dimension Reduction.** *arXiv* 2018:arXiv:1802.03426.
- 862 32. Yu KH, Zhang C, Berry GJ, Altman RB, Re C, Rubin DL, Snyder M: **Predicting non-**  
863 **small cell lung cancer prognosis by fully automated microscopic pathology image**  
864 **features.** *Nat Commun* 2016, **7**:12474.
- 865 33. Uno H, Cai T, Pencina MJ, D'Agostino RB, Wei LJ: **On the C-statistics for evaluating**  
866 **overall adequacy of risk prediction procedures with censored survival data.** *Stat*  
867 *Med* 2011, **30**:1105-1117.



- 868 34. Xiang JF, Yin QF, Chen T, Zhang Y, Zhang XO, Wu Z, Zhang S, Wang HB, Ge J, Lu X,  
869 et al: **Human colorectal cancer-specific CCAT1-L lncRNA regulates long-range**  
870 **chromatin interactions at the MYC locus.** *Cell Res* 2014, **24**:513-531.
- 871 35. Futreal PA, Coin L, Marshall M, Down T, Hubbard T, Wooster R, Rahman N, Stratton  
872 MR: **A census of human cancer genes.** *Nature reviews Cancer* 2004, **4**:177-183.
- 873 36. Cancer Genome Atlas Research Network. Electronic address aadhe, Cancer Genome  
874 Atlas Research N: **Integrated Genomic Characterization of Pancreatic Ductal**  
875 **Adenocarcinoma.** *Cancer Cell* 2017, **32**:185-203 e113.
- 876 37. Koo BK, van Es JH, van den Born M, Clevers H: **Porcupine inhibitor suppresses**  
877 **paracrine Wnt-driven growth of Rnf43;Znrf3-mutant neoplasia.** *Proc Natl Acad Sci U*  
878 *S A* 2015, **112**:7548-7550.
- 879 38. Giulietti M, Righetti A, Principato G, Piva F: **LncRNA co-expression Network Analysis**  
880 **Reveals Novel Biomarkers for Pancreatic Cancer.** *Carcinogenesis* 2018.
- 881 39. Ahnesorg P, Smith P, Jackson SP: **XLF interacts with the XRCC4-DNA ligase IV**  
882 **complex to promote DNA nonhomologous end-joining.** *Cell* 2006, **124**:301-313.
- 883 40. Sishc BJ, Davis AJ: **The Role of the Core Non-Homologous End Joining Factors in**  
884 **Carcinogenesis and Cancer.** *Cancers (Basel)* 2017, **9**.
- 885 41. van den Brink GR, Bleuming SA, Hardwick JC, Schepman BL, Offerhaus GJ, Keller JJ,  
886 Nielsen C, Gaffield W, van Deventer SJ, Roberts DJ, Peppelenbosch MP: **Indian**  
887 **Hedgehog is an antagonist of Wnt signaling in colonic epithelial cell**  
888 **differentiation.** *Nat Genet* 2004, **36**:277-282.
- 889 42. Lima-Fernandes E, Murison A, da Silva Medina T, Wang Y, Ma A, Leung C, Luciani GM,  
890 Haynes J, Pollett A, Zeller C, et al: **Targeting bivalency de-represses Indian**  
891 **Hedgehog and inhibits self-renewal of colorectal cancer-initiating cells.** *Nat*  
892 *Commun* 2019, **10**:1436.
- 893 43. Lan MS, Wasserfall C, Maclaren NK, Notkins AL: **IA-2, a transmembrane protein of**  
894 **the protein tyrosine phosphatase family, is a major autoantigen in insulin-**  
895 **dependent diabetes mellitus.** *Proc Natl Acad Sci U S A* 1996, **93**:6367-6370.
- 896 44. Bauerschlag DO, Ammerpohl O, Brautigam K, Schem C, Lin Q, Weigel MT, Hilpert F,  
897 Arnold N, Maass N, Meinhold-Heerlein I, Wagner W: **Progression-free survival in**  
898 **ovarian cancer is reflected in epigenetic DNA methylation profiles.** *Oncology* 2011,  
899 **80**:12-20.
- 900 45. Wang Z, Wu Q, Feng S, Zhao Y, Tao C: **Identification of four prognostic LncRNAs**  
901 **for survival prediction of patients with hepatocellular carcinoma.** *PeerJ* 2017,  
902 **5**:e3575.
- 903 46. Zou Z, Ma T, He X, Zhou J, Ma H, Xie M, Liu Y, Lu D, Di S, Zhang Z: **Long intergenic**  
904 **non-coding RNA 00324 promotes gastric cancer cell proliferation via binding with**  
905 **HuR and stabilizing FAM83B expression.** *Cell Death Dis* 2018, **9**:717.
- 906 47. Colaprico A, Silva TC, Olsen C, Garofano L, Cava C, Garolini D, Sabedot TS, Malta TM,  
907 Pagnotta SM, Castiglioni I, et al: **TCGAbiolinks: an R/Bioconductor package for**  
908 **integrative analysis of TCGA data.** *Nucleic Acids Res* 2016, **44**:e71.
- 909 48. Waitkus MS, DiPlas BH, Yan H: **Isocitrate dehydrogenase mutations in gliomas.**  
910 *Neuro Oncol* 2016, **18**:16-26.
- 911 49. Weller M, Stupp R, Reifenberger G, Brandes AA, van den Bent MJ, Wick W, Hegi ME:  
912 **MGMT promoter methylation in malignant gliomas: ready for personalized**  
913 **medicine?** *Nat Rev Neurol* 2010, **6**:39-51.
- 914 50. Reimand J, Isserlin R, Voisin V, Kucera M, Tannus-Lopes C, Rostamianfar R, Wadi L,  
915 Meyer M, Wong J, Xu C, et al: **Pathway enrichment analysis and visualization of**  
916 **omics data using g:Profiler, GSEA, Cytoscape and EnrichmentMap.** *Nature Protoc*  
917 2019, **14**:482-517.

- 918 51. Cancer Genome Atlas Research N, Brat DJ, Verhaak RG, Aldape KD, Yung WK,  
919 Salama SR, Cooper LA, Rheinbay E, Miller CR, Vitucci M, et al: **Comprehensive,**  
920 **Integrative Genomic Analysis of Diffuse Lower-Grade Gliomas.** *N Engl J Med* 2015,  
921 **372:2481-2498.**
- 922 52. Paczkowska M, Barenboim J, Sintupisut N, Fox NS, Zhu H, Abd-Rabbo D, Mee MW,  
923 Boutros PC, PCAWG Drivers and Functional Interpretation Working Group, Reimand J,  
924 PCAWG Consortium: **Integrative pathway enrichment analysis of multivariate omics**  
925 **data.** *Nature Communications* 2019.
- 926 53. Park NI, Guilhamon P, Desai K, McAdam RF, Langille E, O'Connor M, Lan X, Whetstone  
927 H, Coutinho FJ, Vanner RJ, et al: **ASCL1 Reorganizes Chromatin to Direct Neuronal**  
928 **Fate and Suppress Tumorigenicity of Glioblastoma Stem Cells.** *Cell Stem Cell*  
929 2017, **21:209-224 e207.**
- 930 54. Meyer M, Reimand J, Lan X, Head R, Zhu X, Kushida M, Bayani J, Pressey JC, Lionel  
931 AC, Clarke ID, et al: **Single cell-derived clonal analysis of human glioblastoma links**  
932 **functional and genomic heterogeneity.** *Proc Natl Acad Sci U S A* 2015, **112:851-856.**
- 933 55. Dong CY, Cui J, Li DH, Li Q, Hong XY: **HoxA10AS: A novel oncogenic long**  
934 **noncoding RNA in glioma.** *Oncol Rep* 2018, **40:2573-2583.**
- 935 56. McCarthy DJ, Smyth GK: **Testing significance relative to a fold-change threshold is**  
936 **a TREAT.** *Bioinformatics* 2009, **25:765-771.**
- 937 57. Parsons DW, Jones S, Zhang X, Lin JC, Leary RJ, Angenendt P, Mankoo P, Carter H,  
938 Siu IM, Gallia GL, et al: **An integrated genomic analysis of human glioblastoma**  
939 **multiforme.** *Science* 2008, **321:1807-1812.**
- 940 58. Bailey MH, Tokheim C, Porta-Pardo E, Sengupta S, Bertrand D, Weerasinghe A,  
941 Colaprico A, Wendl MC, Kim J, Reardon B, et al: **Comprehensive Characterization of**  
942 **Cancer Driver Genes and Mutations.** *Cell* 2018, **174:1034-1035.**
- 943 59. Gallo M, Ho J, Coutinho FJ, Vanner R, Lee L, Head R, Ling EK, Clarke ID, Dirks PB: **A**  
944 **tumorigenic MLL-homeobox network in human glioblastoma stem cells.** *Cancer*  
945 *Res* 2013, **73:417-427.**
- 946 60. Esposito R, Bosch N, Lanzos A, Polidori T, Pulido-Quetglas C, Johnson R: **Hacking the**  
947 **Cancer Genome: Profiling Therapeutically Actionable Long Non-coding RNAs**  
948 **Using CRISPR-Cas9 Screening.** *Cancer Cell* 2019, **35:545-557.**
- 949 61. Benjamini Y, Hochberg Y: **Controlling the False Discovery Rate - a Practical and**  
950 **Powerful Approach to Multiple Testing.** *Journal of the Royal Statistical Society Series*  
951 *B-Methodological* 1995, **57:289-300.**
- 952 62. Fujimoto A, Furuta M, Totoki Y, Tsunoda T, Kato M, Shiraishi Y, Tanaka H, Taniguchi H,  
953 Kawakami Y, Ueno M, et al: **Whole-genome mutational landscape and**  
954 **characterization of noncoding and structural mutations in liver cancer.** *Nat Genet*  
955 2016, **48:500-509.**
- 956 63. Calabrese C, Davidson NR, Fonseca NA, He Y, Kahles A, Lehmann K, Liu F, Shiraishi  
957 Y, Soulette CM, Urban L, et al: **Genomic basis for RNA alterations revealed by**  
958 **whole-genome analyses of 27 cancer types.** *bioRxiv* 2018, **183889.**
- 959 64. Quinlan AR: **BEDTools: The Swiss-Army Tool for Genome Feature Analysis.** *Curr*  
960 *Protoc Bioinformatics* 2014, **47:11 12 11-34.**
- 961 65. Derrien T, Johnson R, Bussotti G, Tanzer A, Djebali S, Tilgner H, Guernec G, Martin D,  
962 Merkel A, Knowles DG, et al: **The GENCODE v7 catalog of human long noncoding**  
963 **RNAs: analysis of their gene structure, evolution, and expression.** *Genome Res*  
964 2012, **22:1775-1789.**
- 965 66. Reimand J, Kull M, Peterson H, Hansen J, Vilo J: **g:Profiler--a web-based toolset for**  
966 **functional profiling of gene lists from large-scale experiments.** *Nucleic acids*  
967 *research* 2007, **35:W193-200.**

- 968 67. Gu Z, Eils R, Schlesner M: **Complex heatmaps reveal patterns and correlations in**  
969 **multidimensional genomic data.** *Bioinformatics* 2016, **32**:2847-2849.
- 970 68. Pollard SM, Yoshikawa K, Clarke ID, Danovi D, Stricker S, Russell R, Bayani J, Head R,  
971 Lee M, Bernstein M, et al: **Glioma stem cell lines expanded in adherent culture have**  
972 **tumor-specific phenotypes and are suitable for chemical and genetic screens.** *Cell*  
973 *Stem Cell* 2009, **4**:568-580.
- 974 69. Bookout AL, Cummins CL, Mangelsdorf DJ, Pesola JM, Kramer MF: **High-throughput**  
975 **real-time quantitative reverse transcription PCR.** *Curr Protoc Mol Biol* 2006, **Chapter**  
976 **15**:Unit 15 18.
- 977 70. Liao Y, Smyth GK, Shi W: **The R package Rsubread is easier, faster, cheaper and**  
978 **better for alignment and quantification of RNA sequencing reads.** *Nucleic Acids*  
979 *Res* 2019, **47**:e47.
- 980 71. Robinson MD, McCarthy DJ, Smyth GK: **edgeR: a Bioconductor package for**  
981 **differential expression analysis of digital gene expression data.** *Bioinformatics*  
982 2010, **26**:139-140.
- 983 72. Pujar S, O'Leary NA, Farrell CM, Loveland JE, Mudge JM, Wallin C, Giron CG, Diekhans  
984 M, Barnes I, Bennett R, et al: **Consensus coding sequence (CCDS) database: a**  
985 **standardized set of human and mouse protein-coding regions supported by**  
986 **expert curation.** *Nucleic Acids Res* 2018, **46**:D221-D228.
- 987 73. Robinson MD, Oshlack A: **A scaling normalization method for differential**  
988 **expression analysis of RNA-seq data.** *Genome Biol* 2010, **11**:R25.
- 989 74. Brown MB: **A Method for Combining Non-Independent, One-Sided Tests of**  
990 **Significance.** *Biometrics* 1975, **31**:987-992.  
991
